# Supplementary material for: Transamidation vitrimers enabled by neighbouring fluorine atom activation
Source: Royal Society of Chemistry journal article supplement (doi:10.1039/d3py00577a), 2023-01-01
Supplement: d3py00577a1.pdf [file d3py00577a1.pdf]

## **Transamidation vitrimers enabled by neighbouring fluorine atom activation**

Dimitri Berne<sup>a</sup>, Gwendal Tanguy<sup>a</sup>, Sylvain Caillol<sup>a</sup>, Vincent Ladmiral<sup>a</sup>, Rinaldo Poli<sup>b,c</sup>, Eric Leclerc<sup>a</sup>

<sup>a</sup> ICGM, Univ Montpellier, CNRS, ENSCM, Montpellier, France

<sup>b</sup> CNRS, LCC (Laboratoire de Chimie de Coordination), UPS, INP, Université de Toulouse, 31077 Toulouse, Cedex 4 (France)

<sup>c</sup> Institut Universitaire de France, 75231 Paris (France)

## ***Supporting information***

## ***Table of content***

|                                                      |                  |
|------------------------------------------------------|------------------|
| <b><i>NMR spectra of isolated compounds.....</i></b> | <b><i>3</i></b>  |
| <b><i>DFT Study .....</i></b>                        | <b><i>13</i></b> |
| <b><i>Kinetic data and graphs.....</i></b>           | <b><i>20</i></b> |
| <b><i>Material characterizations.....</i></b>        | <b><i>23</i></b> |

## ***NMR spectra of isolated compounds***

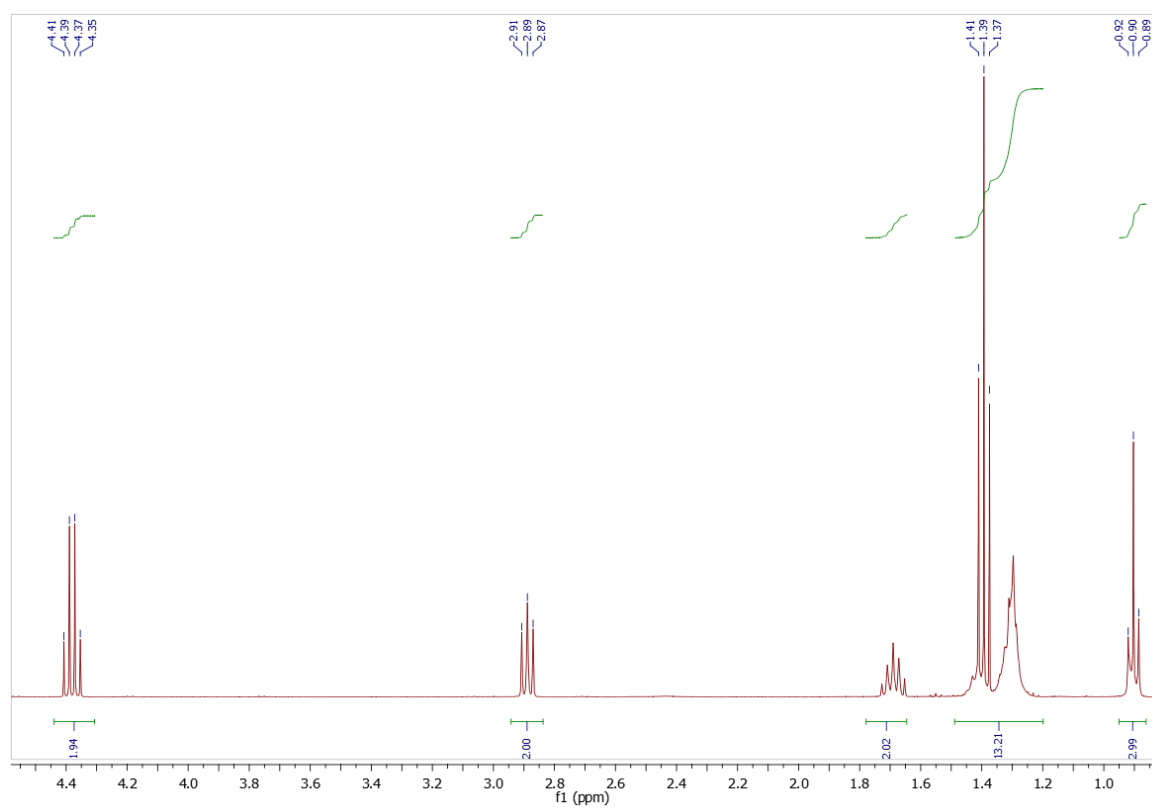

Figure S1. <sup>1</sup>H-NMR of **1**

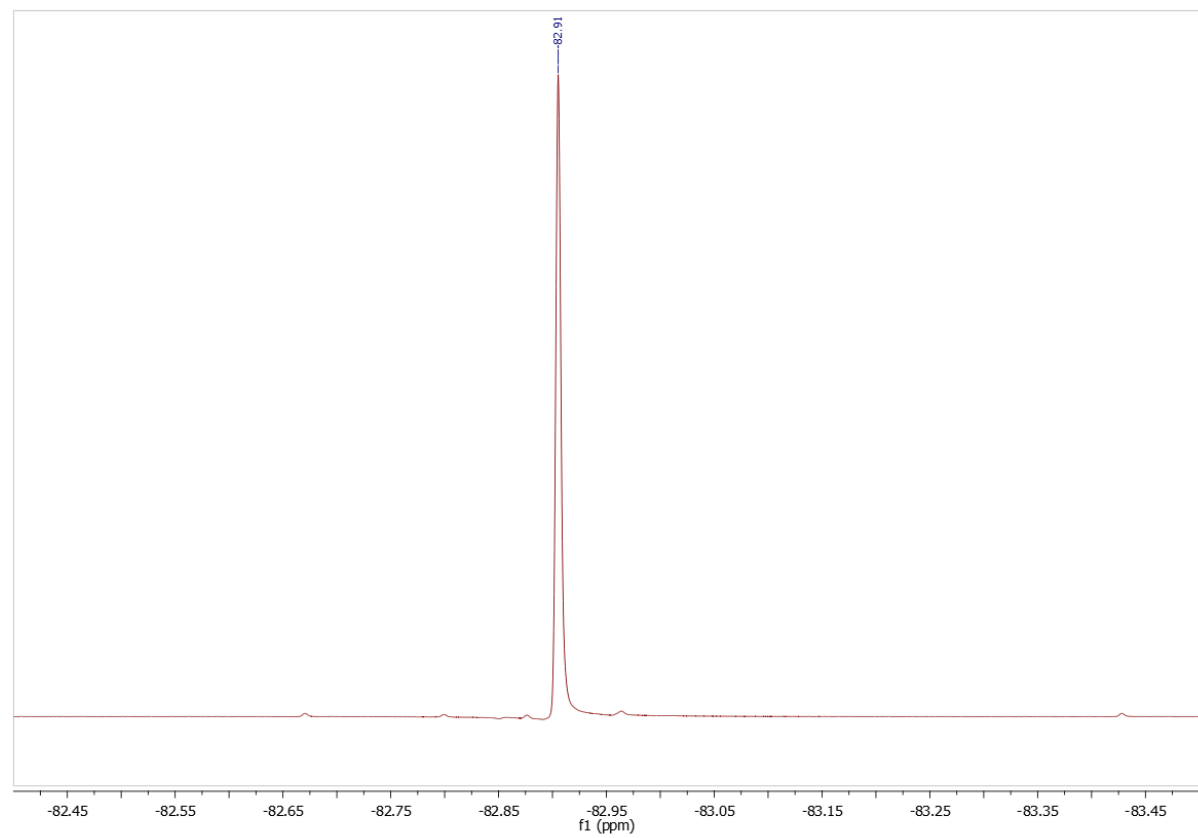

Figure S2. <sup>19</sup>F-NMR of **1**

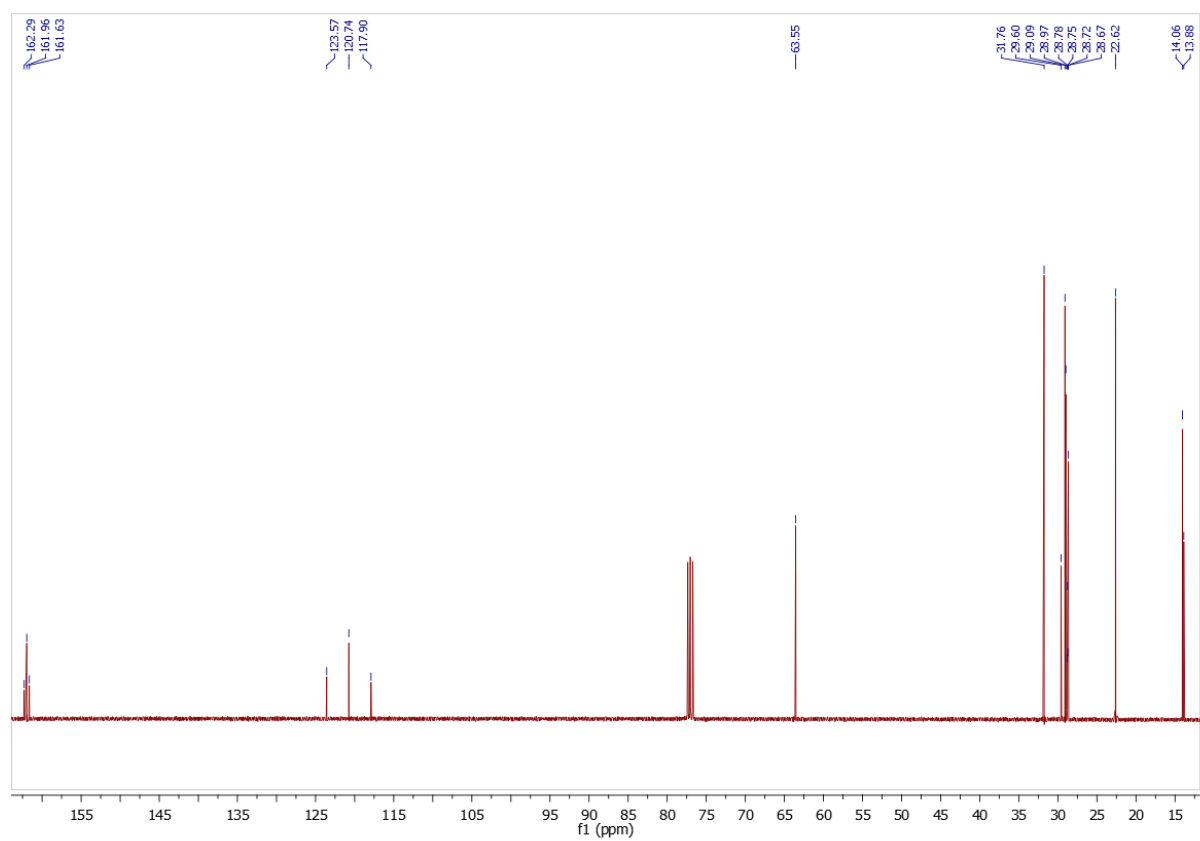

Figure S3.  $^{13}\text{C}$ -NMR of **1**

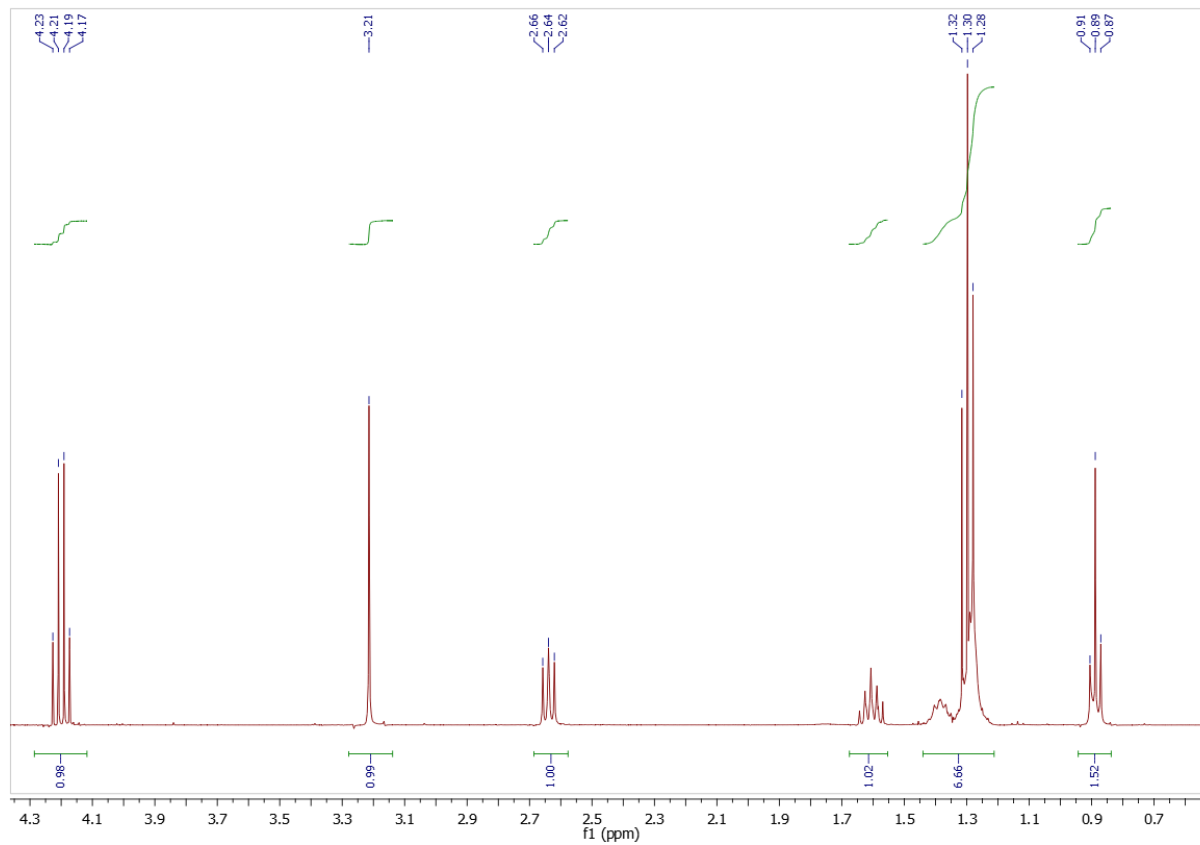

Figure S4.  $^1\text{H}$ -NMR of **2**

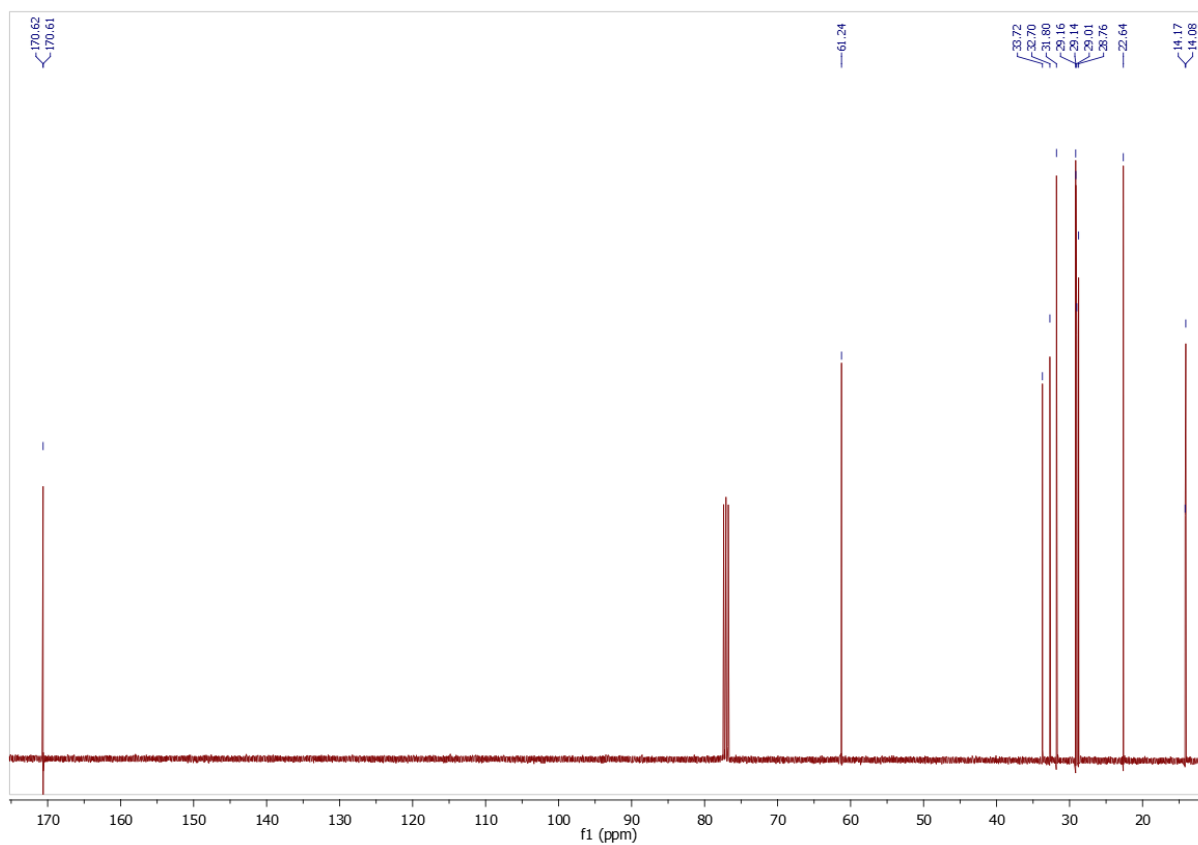

Figure S5.  $^{13}\text{C-NMR}$  of **2**

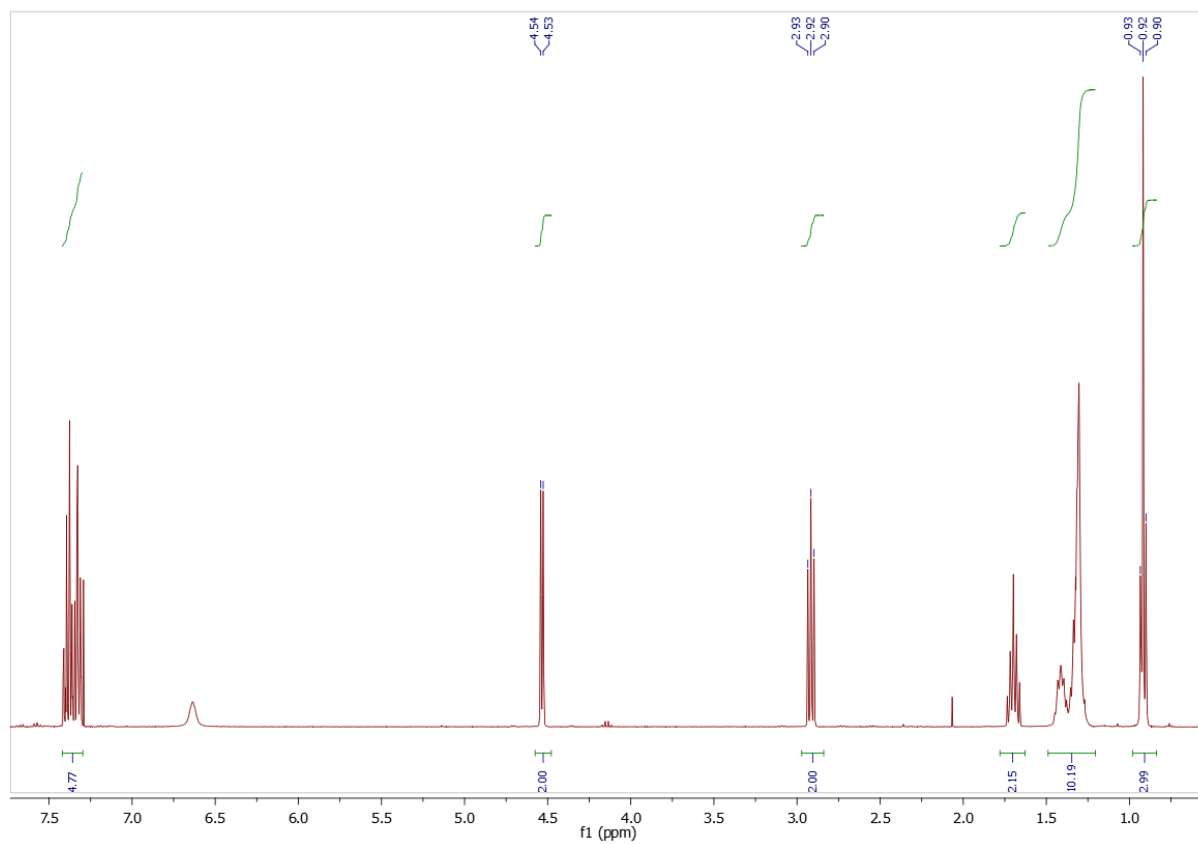

Figure S6.  $^1\text{H-NMR}$  of **3**

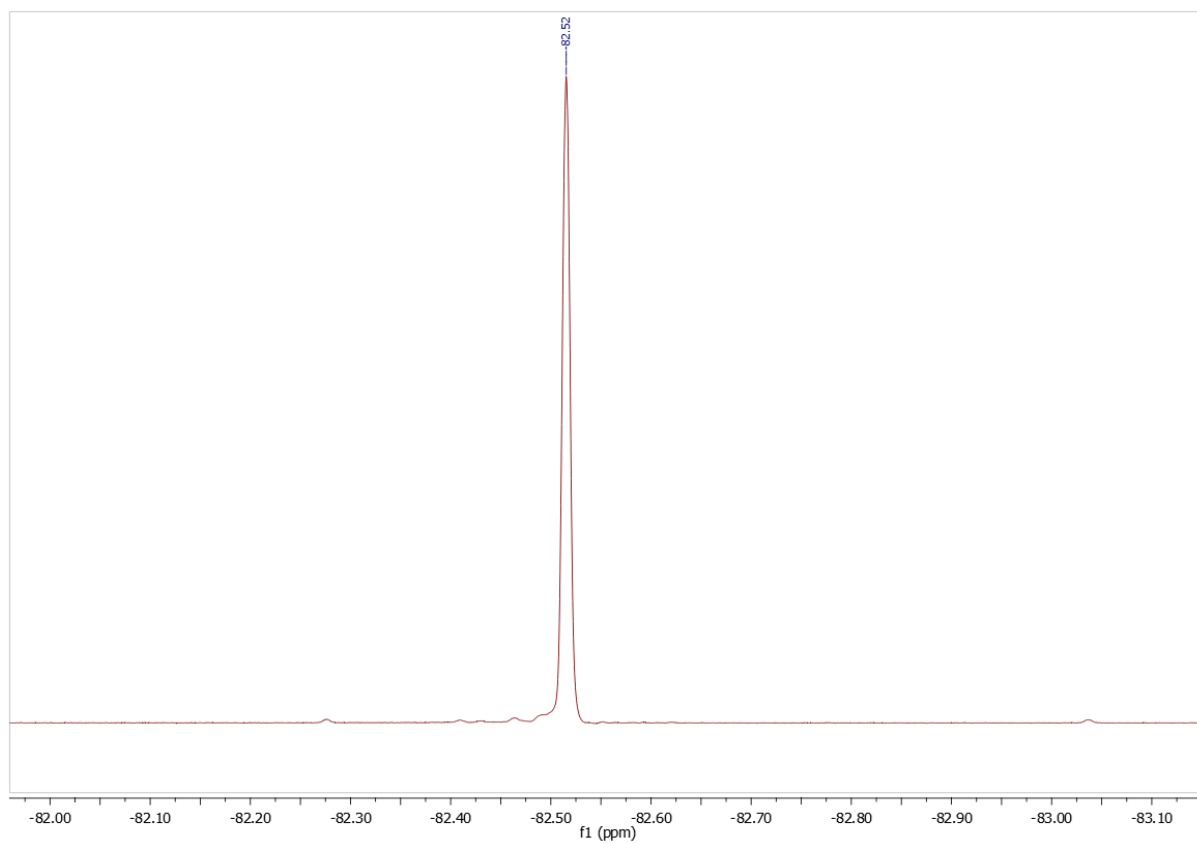

Figure S7.  $^{19}\text{F}$ -NMR of **3**

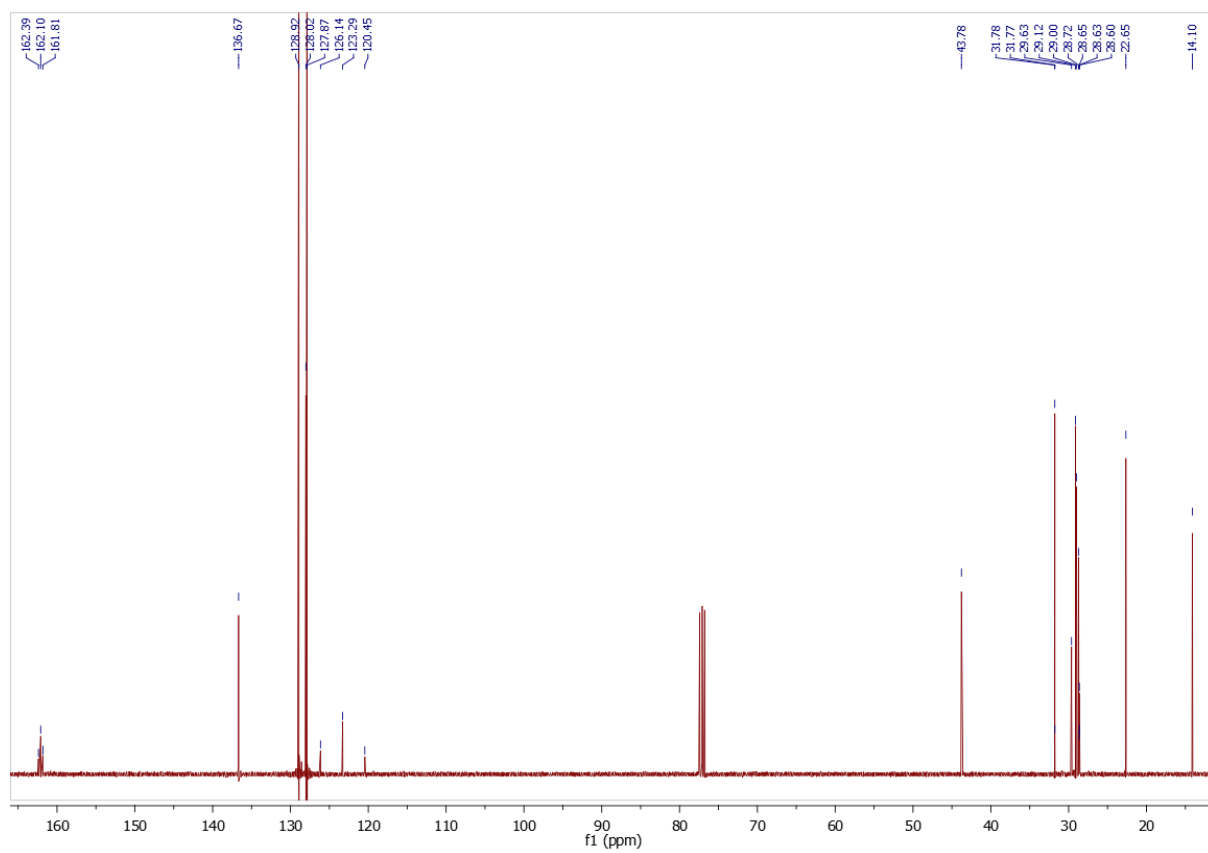

Figure S8.  $^{13}\text{C}$ -NMR of **3**

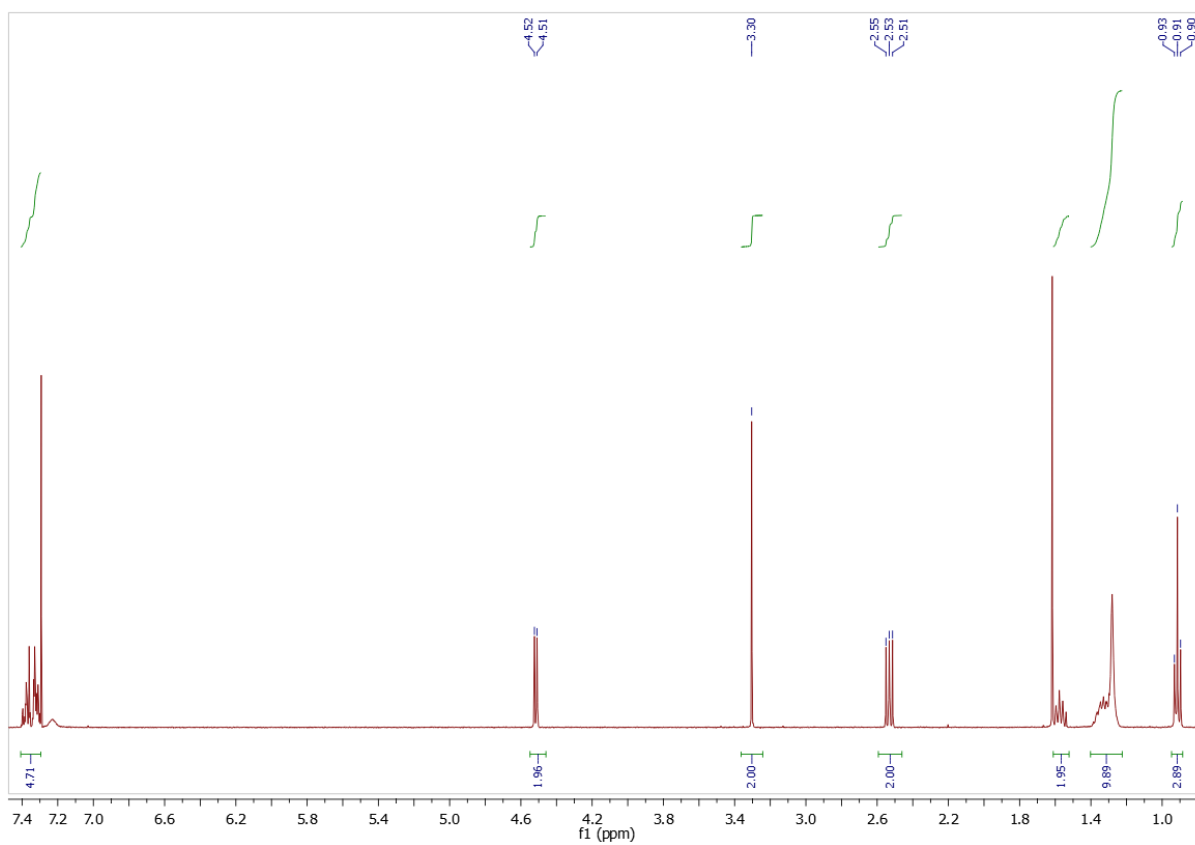

Figure S9.  $^1\text{H-NMR}$  of **4**

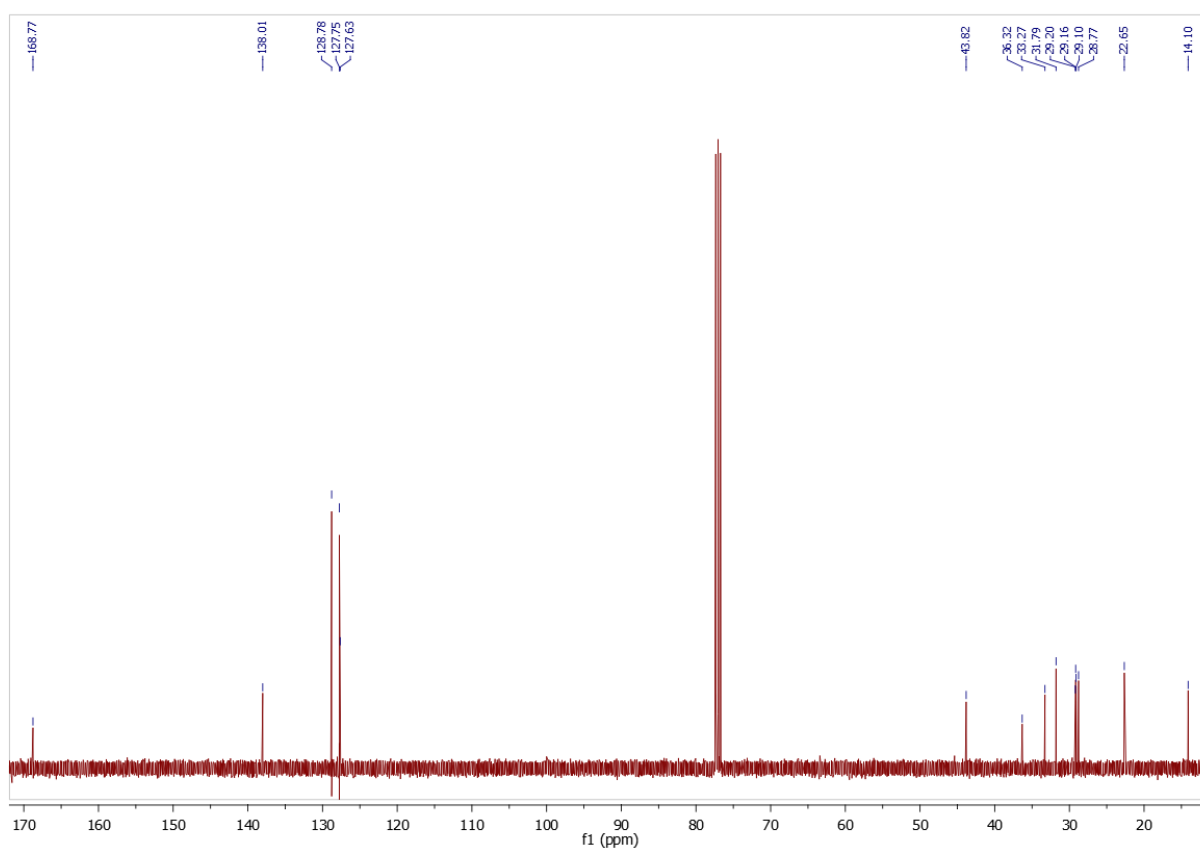

Figure S10.  $^{13}\text{C-NMR}$  of **4**



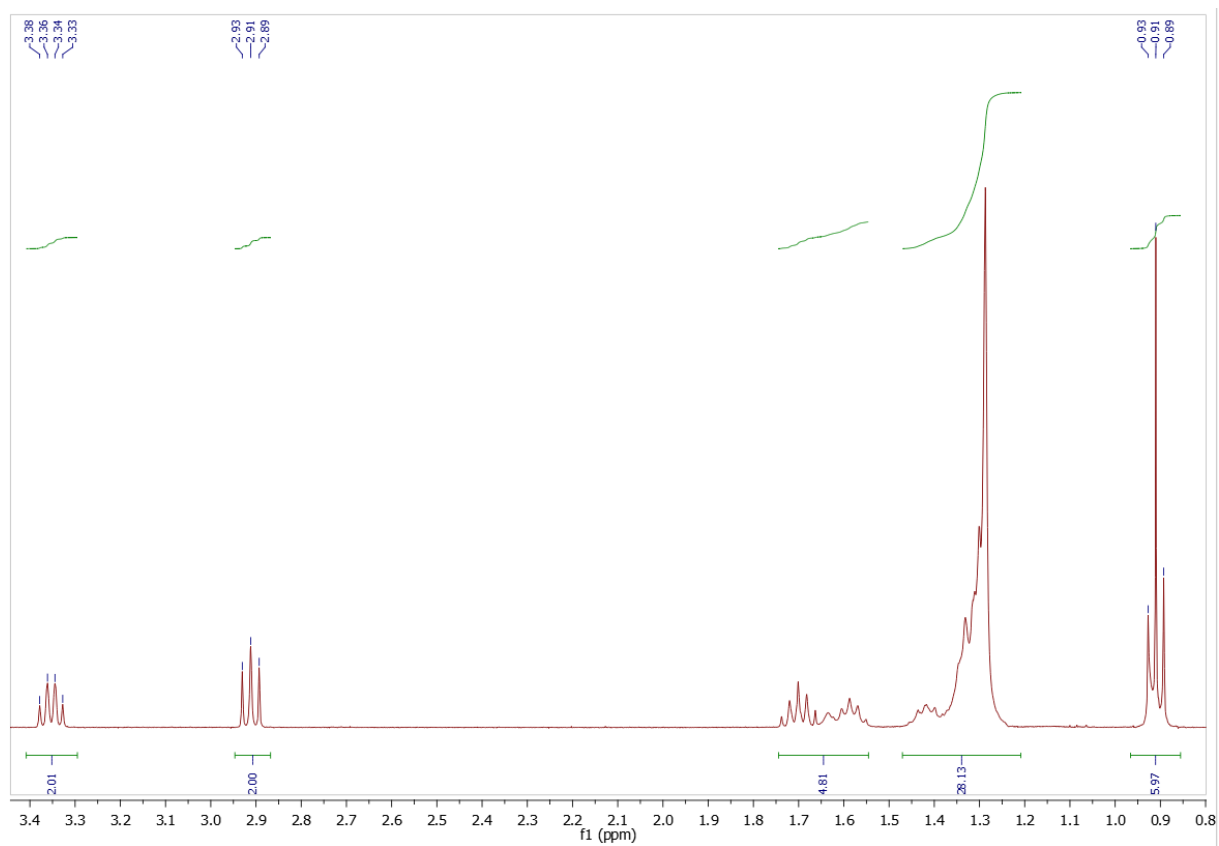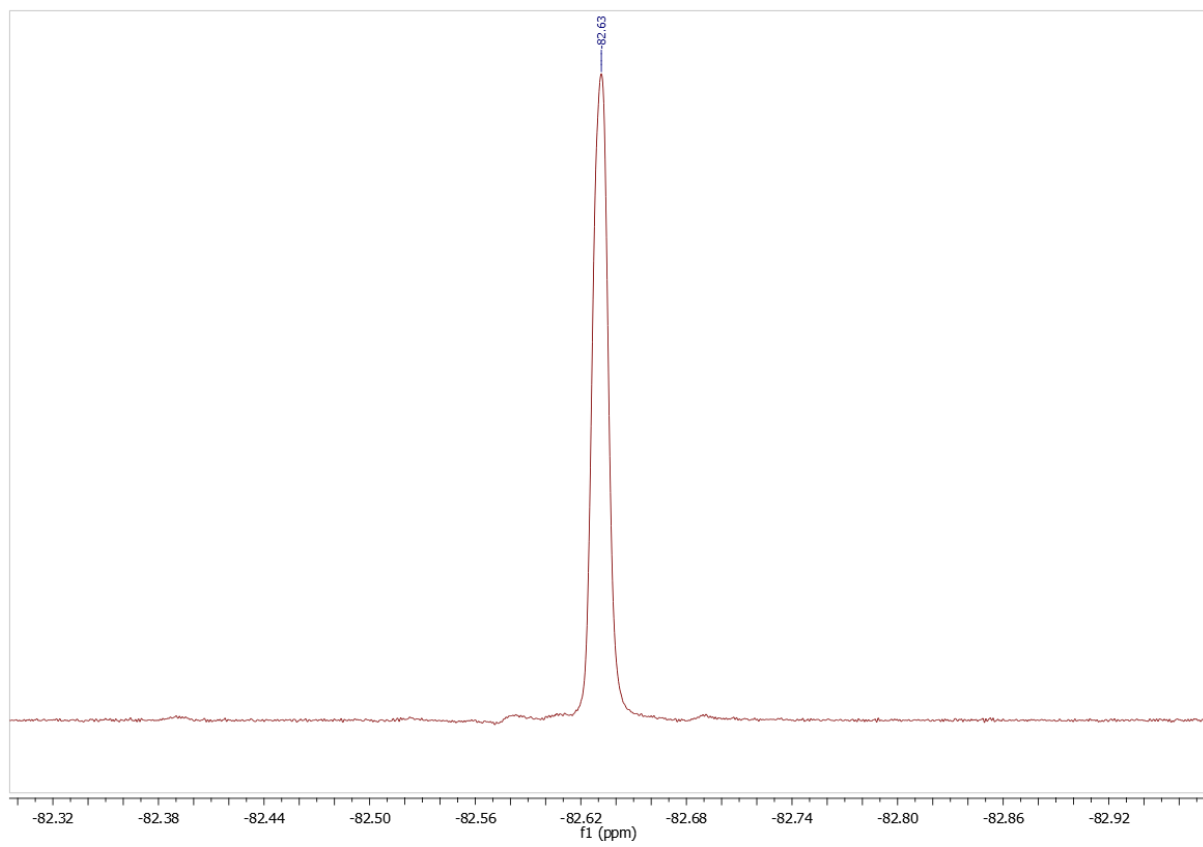

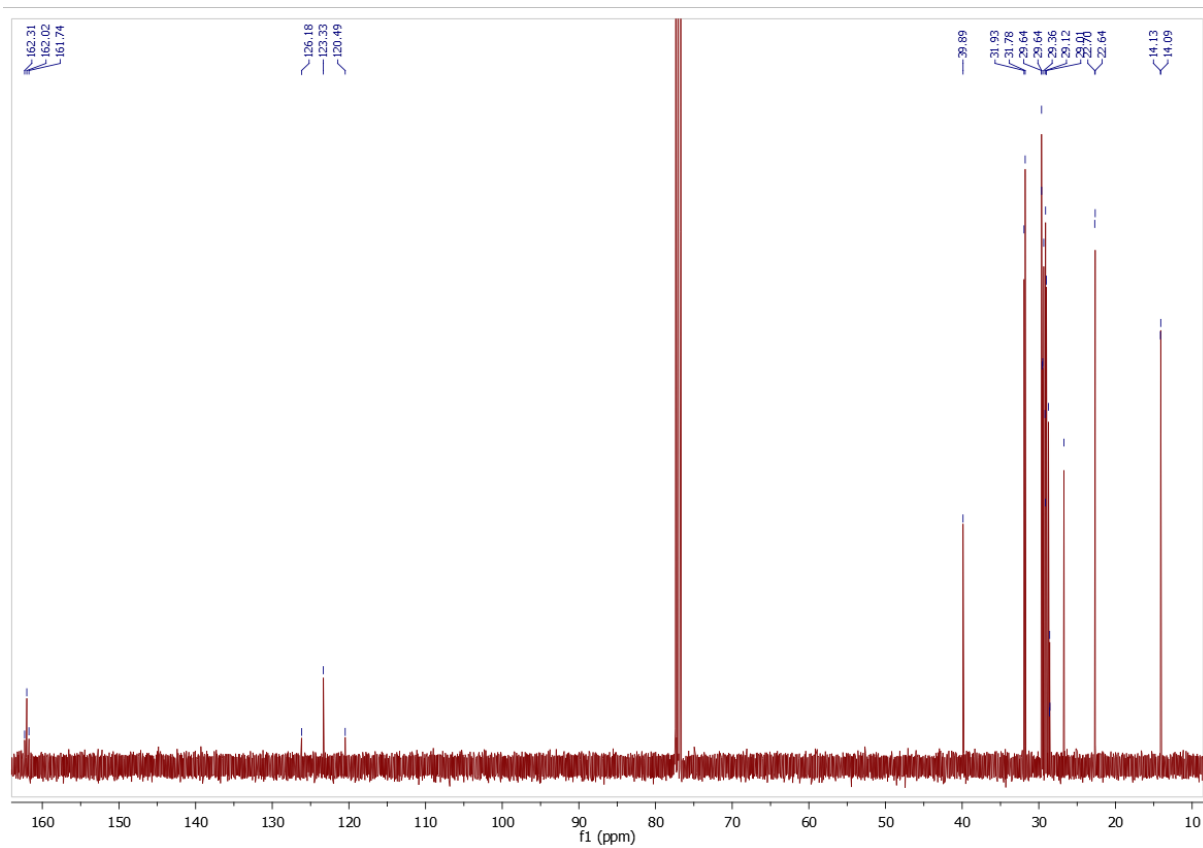

Figure S13.  $^{13}\text{C}$ -NMR of **9**

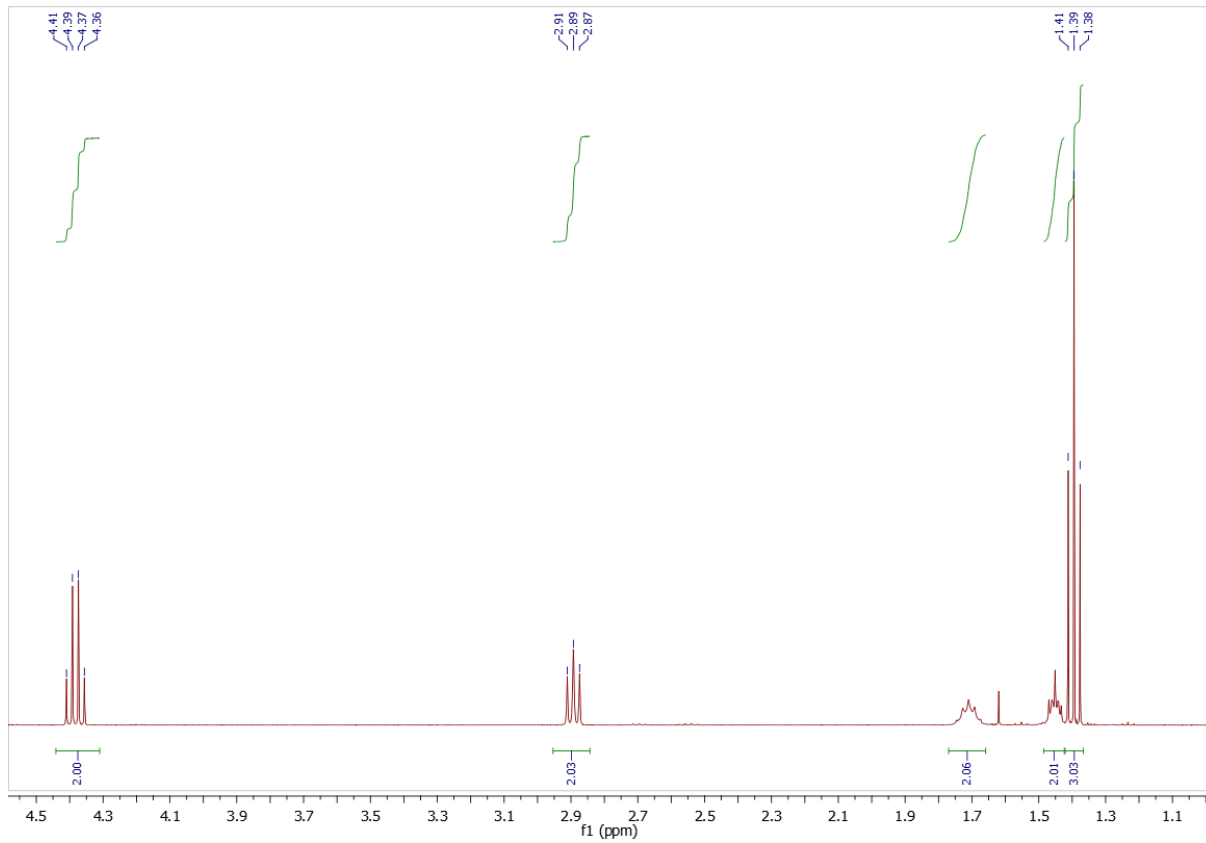

Figure S14.  $^1\text{H}$ -NMR of **10**

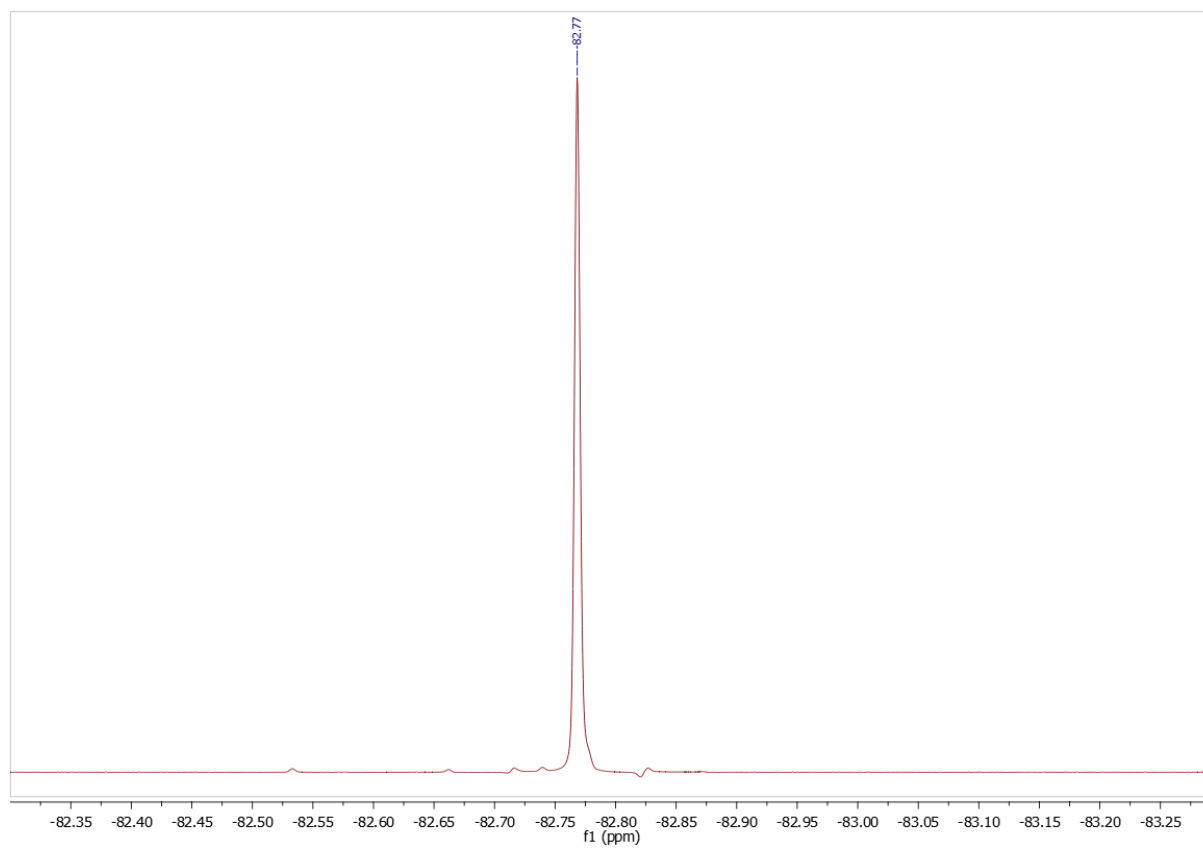

Figure S15.  $^{19}\text{F}$ -NMR of **10**

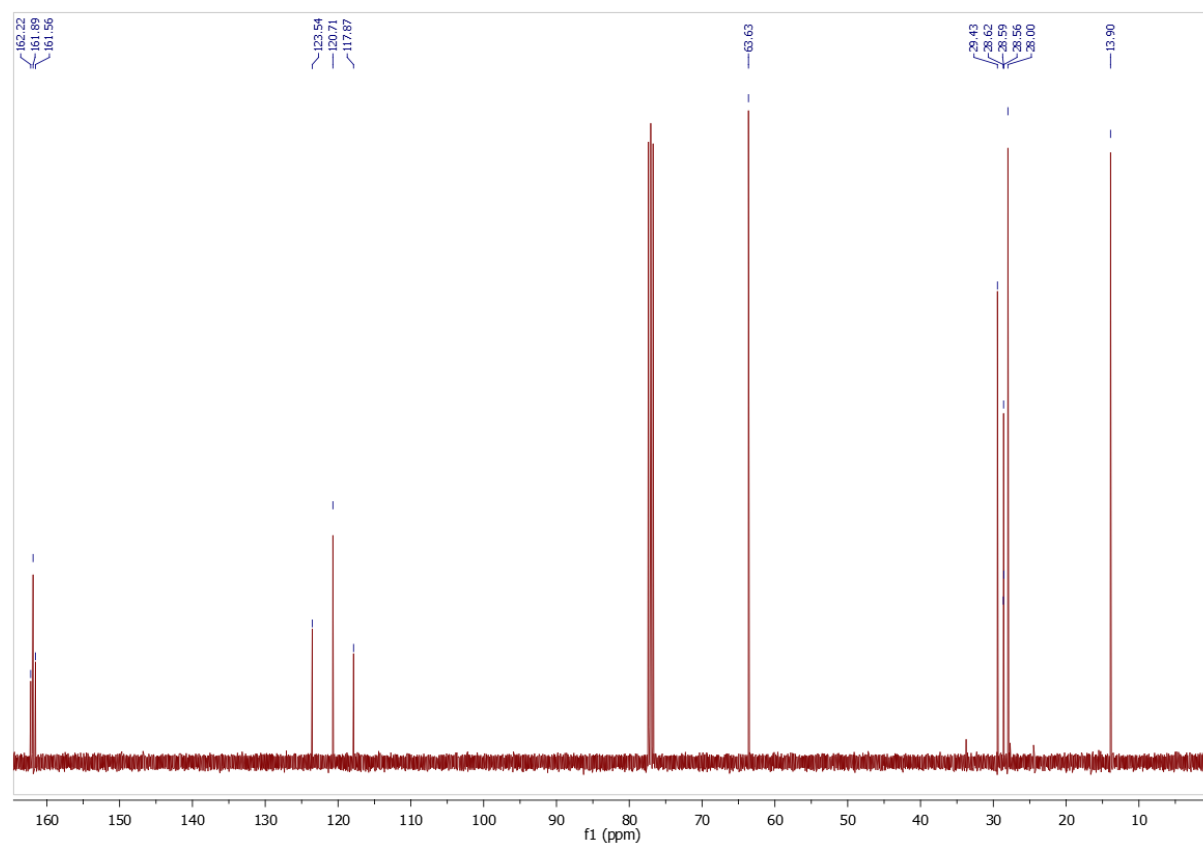

Figure S16.  $^{13}\text{C}$ -NMR of **10**

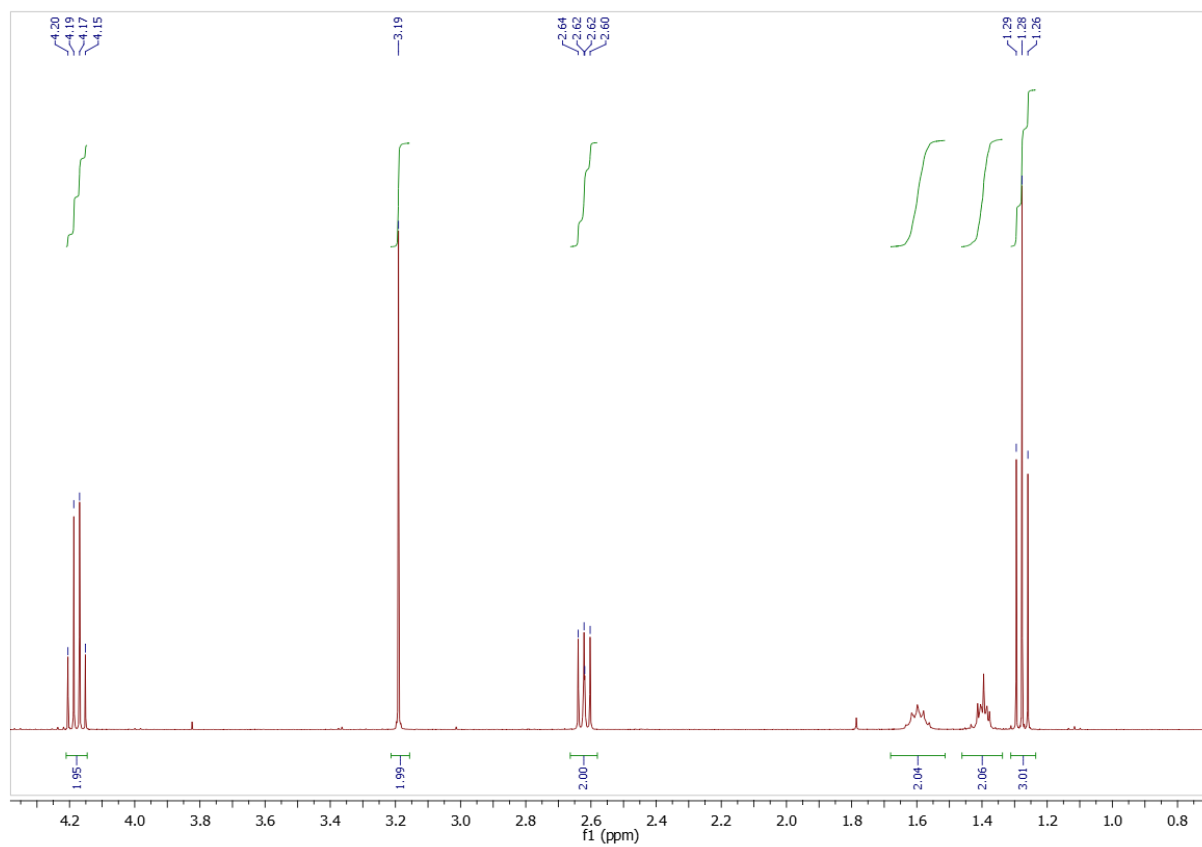

Figure S17.  $^1\text{H-NMR}$  of **11**

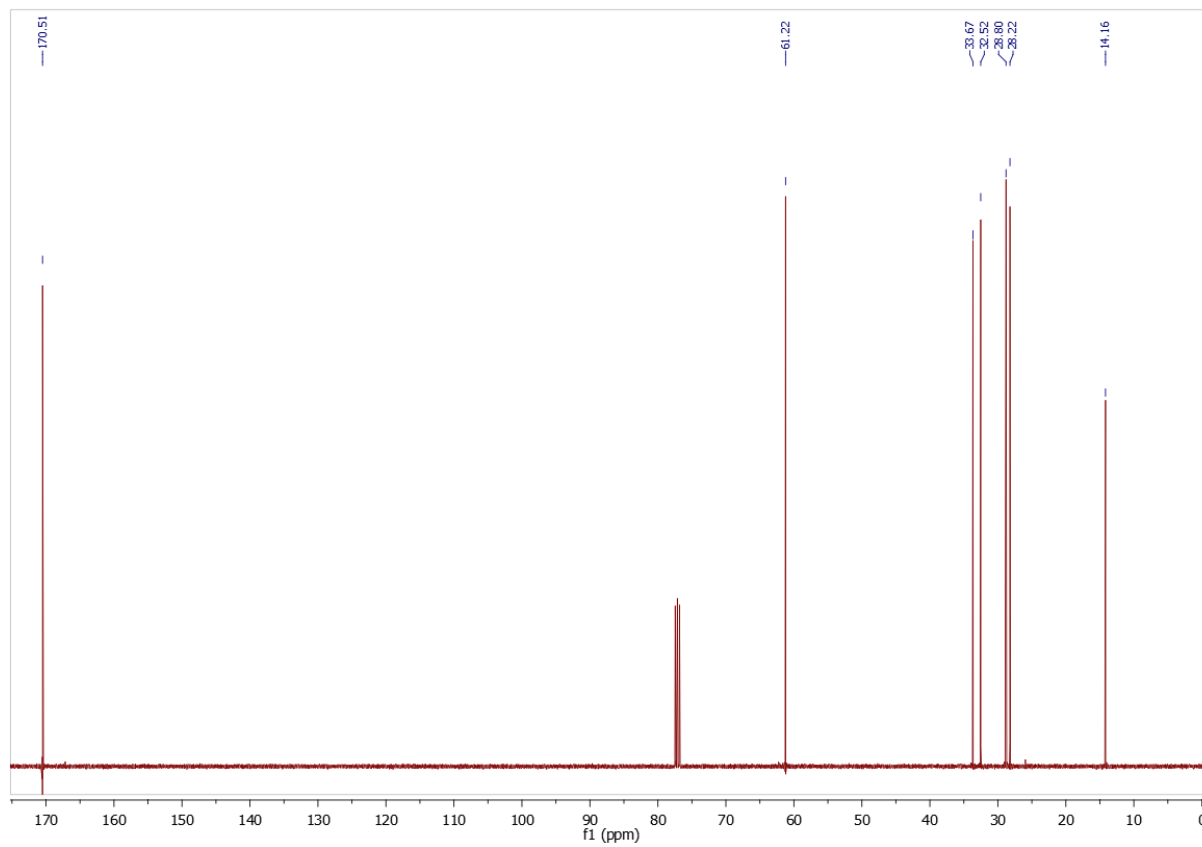

Figure S18.  $^{13}\text{C-NMR}$  of **11**

## ***DFT study***

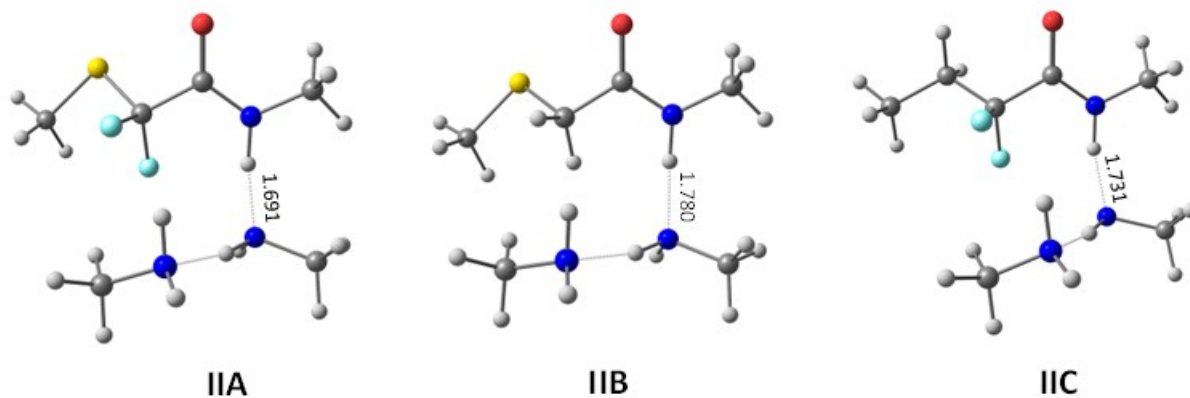

Figure S19. View of the optimized geometries of intermediates II (Figure 1)

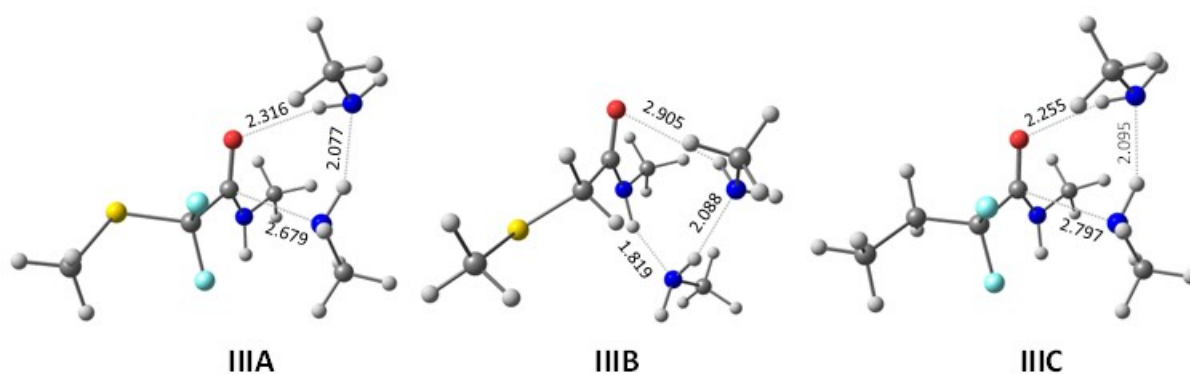

Figure S20. View of the optimized geometries of intermediates III (Figure 1)

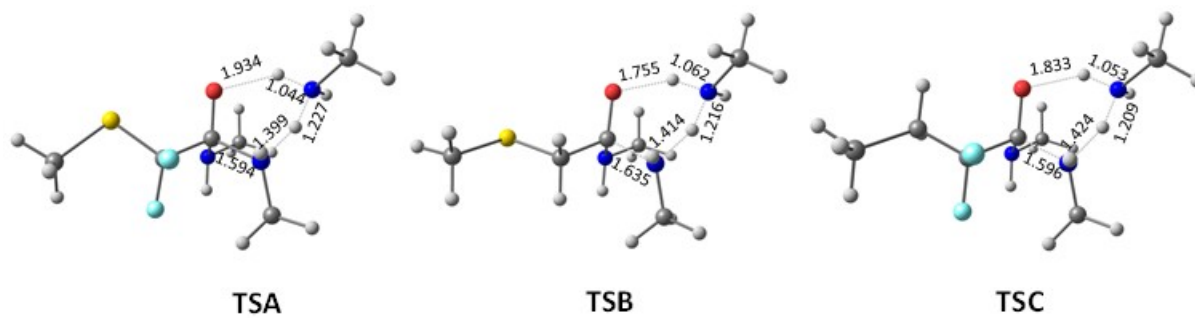

Figure S21. View of the optimized geometries of the transition states TS (Figure 1)

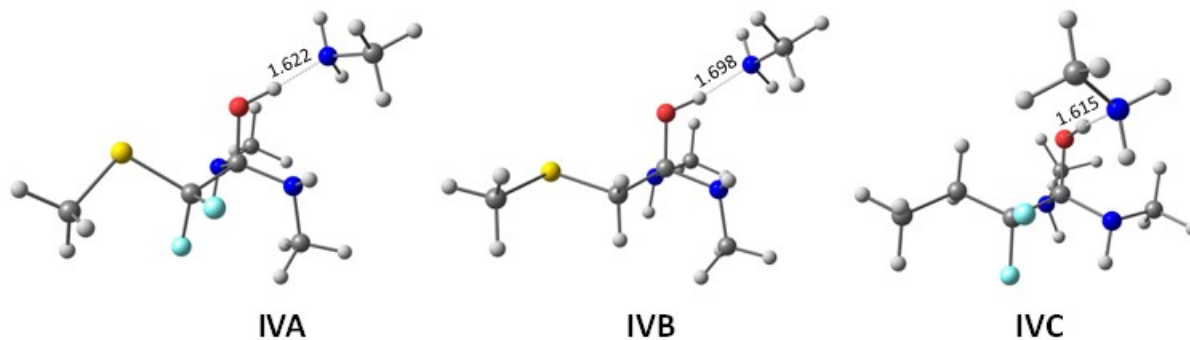

Figure S22. View of the optimized geometries of the tetrahedral intermediates IV (Figure 1)

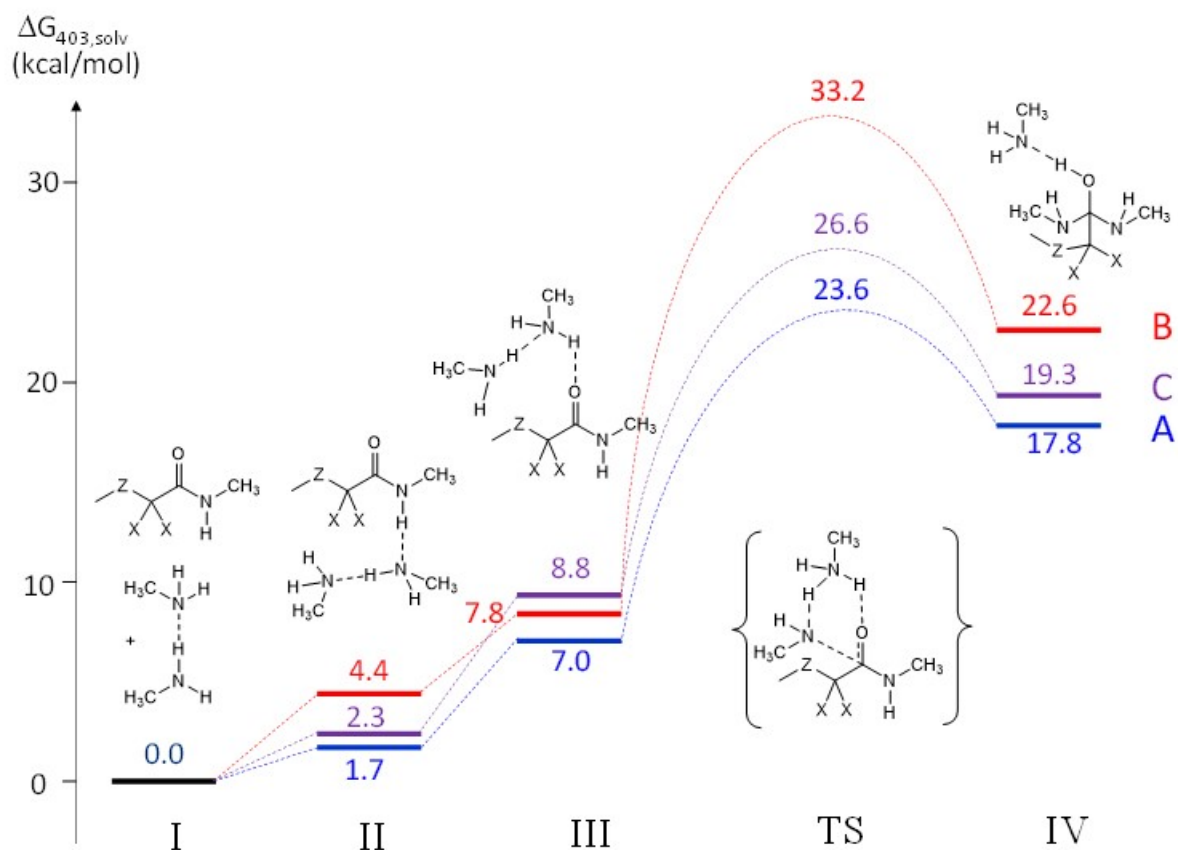

Figure S23. Gibbs energy profile ( $T = 403$  K) for the transamidation process of the model molecules defined in Scheme 4.

Table S1. Cartesian coordinates ( $\text{\AA}$ ) and energies (hartrees) of all optimized geometries

|                                            |    |              |              |              |
|--------------------------------------------|----|--------------|--------------|--------------|
| <b>Amine reagent</b>                       | 7  | -1.342135000 | -0.668341000 | -0.156406000 |
|                                            | 1  | -1.345804000 | -1.312315000 | 0.643402000  |
| <b>MeNH<sub>2</sub></b>                    | 1  | -0.446251000 | -0.148599000 | -0.079205000 |
| E = -95.8928955381                         | 6  | -2.441746000 | 0.297157000  | 0.033932000  |
| G <sub>298</sub> = -95.850563              | 1  | -3.416484000 | -0.217177000 | -0.023804000 |
| G <sub>403</sub> = -95.862423              | 1  | -2.421766000 | 0.861792000  | 0.991601000  |
|                                            | 1  | -2.424929000 | 1.041109000  | -0.780497000 |
|                                            | 7  | 0.761074000  | -0.000033000 | -0.134362000 |
|                                            | 1  | 1.134526000  | -0.811805000 | 0.370759000  |
|                                            | 1  | 1.134156000  | 0.811927000  | 0.370767000  |
|                                            | 6  | -0.709175000 | -0.000026000 | 0.017321000  |
|                                            | 1  | -1.131554000 | -0.885776000 | -0.485116000 |
|                                            | 1  | -1.078679000 | -0.000633000 | 1.064152000  |
|                                            | 1  | -1.130917000 | 0.886675000  | -0.483956000 |
| <b>MeNH<sub>2</sub>...MeNH<sub>2</sub></b> |    |              |              |              |
| E = -191.793084642                         |    |              |              |              |
| G <sub>298</sub> = -191.695455             |    |              |              |              |
| G <sub>403</sub> = -191.713528             |    |              |              |              |
|                                            | 7  | 1.402238000  | 0.739805000  | 0.005794000  |
|                                            | 1  | 1.626002000  | 1.312083000  | -0.815233000 |
|                                            | 1  | 1.628179000  | 1.320878000  | 0.819777000  |
|                                            | 6  | 2.265869000  | -0.458498000 | 0.009835000  |
|                                            | 1  | 2.030800000  | -1.082180000 | -0.867708000 |
|                                            | 1  | 3.353845000  | -0.246171000 | -0.003567000 |
|                                            | 1  | 2.050952000  | -1.061628000 | 0.906914000  |
|                                            | 7  | -1.342135000 | -0.668341000 | -0.156406000 |
|                                            | 1  | -1.345804000 | -1.312315000 | 0.643402000  |
|                                            | 1  | -0.446251000 | -0.148599000 | -0.079205000 |
|                                            | 6  | -2.441746000 | 0.297157000  | 0.033932000  |
|                                            | 1  | -3.416484000 | -0.217177000 | -0.023804000 |
|                                            | 1  | -2.421766000 | 0.861792000  | 0.991601000  |
|                                            | 1  | -2.424929000 | 1.041109000  | -0.780497000 |
| <b>A. Systems with X = F, Z = S</b>        |    |              |              |              |
| <b>IA</b>                                  |    |              |              |              |
| E = -884.713410395                         |    |              |              |              |
| G <sub>298</sub> = -884.636394             |    |              |              |              |
| G <sub>403</sub> = -884.658613             |    |              |              |              |
|                                            | 6  | 3.007870000  | -0.217613000 | -0.440583000 |
|                                            | 1  | 2.872550000  | -1.107312000 | -1.069246000 |
|                                            | 1  | 3.841944000  | 0.383906000  | -0.830235000 |
|                                            | 1  | 3.221787000  | -0.499912000 | 0.599417000  |
|                                            | 16 | 1.528159000  | 0.866007000  | -0.514605000 |
|                                            | 6  | 0.347552000  | -0.261598000 | 0.299791000  |
|                                            | 6  | -1.083383000 | 0.313166000  | 0.173542000  |
|                                            | 8  | -1.300201000 | 1.472362000  | 0.554572000  |
|                                            | 7  | -1.996776000 | -0.517862000 | -0.357027000 |
|                                            | 1  | -1.720376000 | -1.465545000 | -0.609100000 |
|                                            | 6  | -3.391622000 | -0.109565000 | -0.514892000 |
|                                            | 1  | -3.928546000 | -0.146931000 | 0.447453000  |

|   |              |              |              |
|---|--------------|--------------|--------------|
| 1 | -3.434454000 | 0.919767000  | -0.900253000 |
| 1 | -3.879001000 | -0.786719000 | -1.227865000 |
| 9 | 0.635150000  | -0.417217000 | 1.650158000  |
| 9 | 0.439526000  | -1.544291000 | -0.230271000 |

**IIA**

E = -1076.52932423

G<sub>298</sub> = -1076.337140

G<sub>403</sub> = -1076.369362

|    |              |              |              |
|----|--------------|--------------|--------------|
| 7  | 0.806173000  | -1.667293000 | 0.007852000  |
| 8  | -1.117199000 | -2.298305000 | -1.093750000 |
| 6  | -0.439648000 | -1.482417000 | -0.435745000 |
| 6  | -1.085437000 | -0.118609000 | -0.099300000 |
| 6  | 1.495307000  | -2.913896000 | -0.317644000 |
| 1  | 1.716224000  | -2.982820000 | -1.396783000 |
| 1  | 2.438544000  | -2.947850000 | 0.243955000  |
| 1  | 0.879907000  | -3.784416000 | -0.039204000 |
| 7  | 2.544088000  | 0.203262000  | 1.053511000  |
| 1  | 1.168843000  | 1.466917000  | -1.573310000 |
| 6  | 3.940244000  | -0.256160000 | 0.920039000  |
| 1  | 4.693249000  | 0.536041000  | 1.102724000  |
| 1  | 4.140791000  | -1.080585000 | 1.623280000  |
| 1  | 4.099761000  | -0.639946000 | -0.100930000 |
| 7  | 1.786957000  | 2.134680000  | -1.100726000 |
| 1  | 2.367999000  | 0.985053000  | 0.383960000  |
| 6  | 0.975010000  | 3.271340000  | -0.621248000 |
| 1  | 0.388160000  | 3.780388000  | -1.411501000 |
| 1  | 0.271822000  | 2.917082000  | 0.147147000  |
| 1  | 1.633024000  | 4.020479000  | -0.151737000 |
| 16 | -2.819627000 | -0.376107000 | 0.404978000  |
| 1  | 1.386897000  | -0.896994000 | 0.498264000  |
| 6  | -3.153811000 | 1.313421000  | 1.039773000  |
| 1  | -2.948798000 | 2.062831000  | 0.262706000  |
| 1  | -4.225571000 | 1.336396000  | 1.285447000  |
| 1  | -2.567180000 | 1.519301000  | 1.944598000  |
| 1  | 2.448052000  | 2.462172000  | -1.812346000 |
| 1  | 2.380704000  | 0.567916000  | 1.997254000  |
| 9  | -0.385246000 | 0.583738000  | 0.866853000  |
| 9  | -1.011566000 | 0.694659000  | -1.241618000 |

**IIIA**

E = -1076.52032869

G<sub>298</sub> = -1076.328372

G<sub>403</sub> = -1076.361013

|   |              |              |              |
|---|--------------|--------------|--------------|
| 7 | 0.169278000  | 1.513142000  | 1.058224000  |
| 8 | 0.603054000  | -0.730958000 | 1.315119000  |
| 6 | 0.022522000  | 0.203754000  | 0.743722000  |
| 6 | -1.167209000 | -0.109545000 | -0.198904000 |
| 6 | 1.293590000  | 1.932141000  | 1.890984000  |
| 1 | 2.259929000  | 1.772609000  | 1.381532000  |
| 1 | 1.181633000  | 2.998448000  | 2.127373000  |
| 1 | 1.296008000  | 1.355494000  | 2.827597000  |
| 7 | 1.513110000  | 0.473591000  | -1.466433000 |
| 1 | 2.910587000  | -0.733844000 | 1.116060000  |
| 6 | 1.643846000  | 1.874405000  | -1.874806000 |
| 1 | 2.454728000  | 2.080123000  | -2.606767000 |
| 1 | 0.697678000  | 2.225870000  | -2.319887000 |
| 1 | 1.842067000  | 2.501907000  | -0.989144000 |
| 7 | 3.481818000  | -1.022871000 | 0.313278000  |
| 1 | 2.378508000  | 0.125624000  | -1.020640000 |
| 6 | 2.994166000  | -2.342170000 | -0.139286000 |
| 1 | 3.053343000  | -3.142674000 | 0.625312000  |

|    |              |              |              |
|----|--------------|--------------|--------------|
| 1  | 1.939283000  | -2.251812000 | -0.439743000 |
| 1  | 3.569765000  | -2.670221000 | -1.020629000 |
| 16 | -2.650482000 | -0.465954000 | 0.826529000  |
| 1  | -0.217683000 | 2.192763000  | 0.404896000  |
| 6  | -3.879231000 | -0.629289000 | -0.526568000 |
| 1  | -3.558397000 | -1.398225000 | -1.242797000 |
| 1  | -4.817237000 | -0.949300000 | -0.049947000 |
| 1  | -4.034783000 | 0.333977000  | -1.030267000 |
| 1  | 4.444593000  | -1.112836000 | 0.653355000  |
| 1  | 1.318107000  | -0.121267000 | -2.275407000 |
| 9  | -0.871244000 | -1.190380000 | -0.998829000 |
| 9  | -1.432132000 | 0.942991000  | -1.067021000 |

**TSA**

E = -1076.50080001

G<sub>298</sub> = -1076.305193

G<sub>403</sub> = -1076.334484

Imaginary frequency = 615.8i cm<sup>-1</sup>

|    |              |              |              |
|----|--------------|--------------|--------------|
| 7  | 0.162778000  | 1.426139000  | 1.001491000  |
| 8  | 0.583586000  | -0.897653000 | 0.978701000  |
| 6  | 0.215893000  | 0.154023000  | 0.263853000  |
| 6  | -1.226185000 | -0.065974000 | -0.337875000 |
| 6  | 1.400126000  | 1.764114000  | 1.708225000  |
| 1  | 2.275651000  | 1.964052000  | 1.053762000  |
| 1  | 1.232171000  | 2.663742000  | 2.320962000  |
| 1  | 1.656607000  | 0.938939000  | 2.389512000  |
| 7  | 1.212352000  | 0.285207000  | -0.972962000 |
| 1  | 2.515768000  | -0.891110000 | 1.059605000  |
| 6  | 1.173098000  | 1.506024000  | -1.803339000 |
| 1  | 1.942628000  | 1.436141000  | -2.589409000 |
| 1  | 0.195060000  | 1.665418000  | -2.286594000 |
| 1  | 1.407324000  | 2.385045000  | -1.183936000 |
| 7  | 3.240369000  | -0.602792000 | 0.364800000  |
| 1  | 2.430233000  | -0.045653000 | -0.369362000 |
| 6  | 3.870394000  | -1.781103000 | -0.273644000 |
| 1  | 4.456706000  | -2.367097000 | 0.450365000  |
| 1  | 3.073051000  | -2.417847000 | -0.683630000 |
| 1  | 4.527000000  | -1.454933000 | -1.093108000 |
| 16 | -2.348150000 | -0.758634000 | 0.926972000  |
| 1  | -0.121821000 | 2.193162000  | 0.385963000  |
| 6  | -3.920203000 | -0.562055000 | -0.002937000 |
| 1  | -3.860700000 | -1.067885000 | -0.977349000 |
| 1  | -4.698404000 | -1.049005000 | 0.603180000  |
| 1  | -4.176173000 | 0.497905000  | -0.136907000 |
| 1  | 3.924718000  | 0.023265000  | 0.801262000  |
| 1  | 1.009753000  | -0.532026000 | -1.561454000 |
| 9  | -1.158794000 | -0.937336000 | -1.434569000 |
| 9  | -1.760660000 | 1.107026000  | -0.890211000 |

**IVA**

E = -1076.51479123

G<sub>298</sub> = -1076.314450

G<sub>403</sub> = -1076.343711

|   |              |              |              |
|---|--------------|--------------|--------------|
| 7 | 0.186220000  | 1.131187000  | 1.375981000  |
| 8 | 0.767604000  | -0.982314000 | 0.466084000  |
| 6 | 0.260214000  | 0.292249000  | 0.180026000  |
| 6 | -1.224649000 | 0.041835000  | -0.288078000 |
| 6 | 1.494882000  | 1.487897000  | 1.943237000  |
| 1 | 2.155999000  | 2.059653000  | 1.263490000  |



|    |              |              |              |
|----|--------------|--------------|--------------|
| 1  | 1.330111000  | 2.086466000  | 2.852399000  |
| 1  | 2.021284000  | 0.569752000  | 2.244555000  |
| 7  | 1.086012000  | 0.870754000  | -0.890165000 |
| 1  | 1.807112000  | -0.958810000 | 0.498381000  |
| 6  | 0.718913000  | 2.195915000  | -1.412519000 |
| 1  | 1.506255000  | 2.528109000  | -2.107961000 |
| 1  | -0.248747000 | 2.232865000  | -1.947651000 |
| 1  | 0.682264000  | 2.927766000  | -0.590223000 |
| 7  | 3.416329000  | -1.152574000 | 0.425872000  |
| 1  | 3.888030000  | -0.258788000 | 0.597428000  |
| 6  | 3.711217000  | -1.625317000 | -0.944624000 |
| 1  | 3.173407000  | -2.569050000 | -1.124810000 |
| 1  | 3.339831000  | -0.882520000 | -1.666472000 |
| 1  | 4.786988000  | -1.791987000 | -1.137059000 |
| 16 | -2.171476000 | -1.100412000 | 0.780699000  |
| 1  | -0.346977000 | 1.979142000  | 1.164000000  |
| 6  | -3.790785000 | -0.954905000 | -0.074336000 |
| 1  | -3.690852000 | -1.213765000 | -1.137587000 |
| 1  | -4.459356000 | -1.681752000 | 0.410048000  |
| 1  | -4.209281000 | 0.054345000  | 0.039494000  |
| 1  | 3.787032000  | -1.816105000 | 1.114235000  |
| 1  | 1.122116000  | 0.187692000  | -1.652405000 |
| 9  | -1.203980000 | -0.439752000 | -1.595410000 |
| 9  | -1.893920000 | 1.266472000  | -0.387231000 |

**B. Systems with X = H, Z = S**

**IB**

E = -686.1786817

G<sub>298</sub> = -686.083489

G<sub>403</sub> = -686.104030

|    |              |              |              |
|----|--------------|--------------|--------------|
| 6  | 3.177009000  | -0.127558000 | 0.265607000  |
| 1  | 3.198252000  | -0.674443000 | 1.220928000  |
| 1  | 3.951397000  | -0.541880000 | -0.397920000 |
| 1  | 3.387720000  | 0.939306000  | 0.436597000  |
| 16 | 1.570514000  | -0.348635000 | -0.585453000 |
| 6  | 0.478425000  | 0.426330000  | 0.693168000  |
| 1  | 0.549517000  | -0.154644000 | 1.626956000  |
| 1  | 0.813758000  | 1.457719000  | 0.872704000  |
| 6  | -0.956426000 | 0.492640000  | 0.176241000  |
| 8  | -1.409190000 | 1.515201000  | -0.370396000 |
| 7  | -1.694038000 | -0.634303000 | 0.335807000  |
| 1  | -1.285652000 | -1.433953000 | 0.815600000  |
| 6  | -3.080659000 | -0.708246000 | -0.116517000 |
| 1  | -3.737536000 | -0.071388000 | 0.500207000  |
| 1  | -3.161410000 | -0.374095000 | -1.162439000 |
| 1  | -3.422577000 | -1.748943000 | -0.043858000 |

**IIB**

E = -877.991588286

G<sub>298</sub> = -877.780115

G<sub>403</sub> = -877.810508

|   |              |              |              |
|---|--------------|--------------|--------------|
| 7 | 0.953009000  | -1.598906000 | 0.007430000  |
| 8 | -0.886559000 | -2.502375000 | -1.014258000 |
| 6 | -0.314135000 | -1.545180000 | -0.446671000 |
| 6 | -1.017378000 | -0.207722000 | -0.238391000 |
| 6 | 1.751360000  | -2.803902000 | -0.188949000 |
| 1 | 1.957294000  | -2.985677000 | -1.258518000 |
| 1 | 2.706415000  | -2.685488000 | 0.341079000  |
| 1 | 1.230043000  | -3.691553000 | 0.206191000  |
| 7 | 2.264189000  | 0.703758000  | 1.016789000  |

|    |              |              |              |
|----|--------------|--------------|--------------|
| 1  | 0.728530000  | 1.647793000  | -1.692227000 |
| 6  | 3.709482000  | 0.479549000  | 0.808122000  |
| 1  | 4.326546000  | 1.394396000  | 0.909440000  |
| 1  | 4.087044000  | -0.264112000 | 1.528510000  |
| 1  | 3.872128000  | 0.076294000  | -0.204927000 |
| 7  | 1.114535000  | 2.437841000  | -1.163674000 |
| 1  | 1.931641000  | 1.425876000  | 0.342552000  |
| 6  | 0.007050000  | 3.275859000  | -0.661207000 |
| 1  | -0.722479000 | 3.589905000  | -1.433570000 |
| 1  | -0.543445000 | 2.733941000  | 0.123509000  |
| 1  | 0.420366000  | 4.185789000  | -0.197287000 |
| 16 | -2.700851000 | -0.488196000 | 0.462320000  |
| 1  | 1.398337000  | -0.749851000 | 0.462519000  |
| 6  | -3.122065000 | 1.259137000  | 0.816301000  |
| 1  | -3.101969000 | 1.865411000  | -0.102673000 |
| 1  | -4.147484000 | 1.265547000  | 1.216978000  |
| 1  | -2.446229000 | 1.691478000  | 1.570159000  |
| 1  | 1.668791000  | 2.976651000  | -1.837177000 |
| 1  | 2.104258000  | 1.072334000  | 1.959751000  |
| 1  | -0.448570000 | 0.444315000  | 0.440092000  |
| 1  | -1.123140000 | 0.291776000  | -1.216503000 |

**IIIB**

E = -877.989850082

G<sub>298</sub> = -877.776874

G<sub>403</sub> = -877.805093

|    |              |              |              |
|----|--------------|--------------|--------------|
| 7  | -0.416008000 | -0.530221000 | 1.324001000  |
| 8  | 0.069331000  | 1.665493000  | 1.800280000  |
| 6  | 0.237957000  | 0.637489000  | 1.110192000  |
| 6  | 1.226927000  | 0.628623000  | -0.054101000 |
| 6  | -1.477772000 | -0.581203000 | 2.325173000  |
| 1  | -2.384238000 | -0.035346000 | 2.001852000  |
| 1  | -1.746639000 | -1.631101000 | 2.508580000  |
| 1  | -1.132015000 | -0.130040000 | 3.266868000  |
| 7  | -1.246767000 | -1.638148000 | -1.127142000 |
| 1  | -2.184314000 | 1.314643000  | 0.001767000  |
| 6  | -2.497617000 | -2.388738000 | -0.916049000 |
| 1  | -3.162441000 | -2.429366000 | -1.802518000 |
| 1  | -2.270181000 | -3.424906000 | -0.616298000 |
| 1  | -3.066599000 | -1.923381000 | -0.094630000 |
| 7  | -2.142849000 | 1.297116000  | -1.023804000 |
| 1  | -1.473453000 | -0.651922000 | -1.361328000 |
| 6  | -1.505022000 | 2.546206000  | -1.489048000 |
| 1  | -2.055325000 | 3.468762000  | -1.215708000 |
| 1  | -0.494457000 | 2.626592000  | -1.060790000 |
| 1  | -1.402651000 | 2.523924000  | -2.586550000 |
| 16 | 2.526712000  | -0.671091000 | 0.152558000  |
| 1  | -0.535816000 | -1.146796000 | 0.473838000  |
| 6  | 3.600669000  | -0.184459000 | -1.250678000 |
| 1  | 4.013363000  | 0.825769000  | -1.102617000 |
| 1  | 4.430448000  | -0.906266000 | -1.290900000 |
| 1  | 3.047223000  | -0.227023000 | -2.201765000 |
| 1  | -3.120110000 | 1.282641000  | -1.334523000 |
| 1  | -0.715635000 | -2.040560000 | -1.904586000 |
| 1  | 1.710625000  | 1.614613000  | -0.087199000 |
| 1  | 0.688689000  | 0.454536000  | -1.000982000 |

**TSB**

E = -877.95261438

G<sub>298</sub> = -877.737920

G<sub>403</sub> = -877.764691

Imaginary frequency = 670.0i cm<sup>-1</sup>

|   |             |             |              |
|---|-------------|-------------|--------------|
| 7 | 0.107788000 | 1.509658000 | -0.580715000 |
|---|-------------|-------------|--------------|

|    |              |              |              |
|----|--------------|--------------|--------------|
| 8  | -0.409262000 | -0.747670000 | -1.010508000 |
| 6  | 0.006513000  | 0.120850000  | -0.093181000 |
| 6  | 1.359775000  | -0.263860000 | 0.571525000  |
| 6  | -1.089799000 | 2.020330000  | -1.249435000 |
| 1  | -1.998961000 | 2.084357000  | -0.611848000 |
| 1  | -0.886711000 | 3.031530000  | -1.637056000 |
| 1  | -1.320270000 | 1.372752000  | -2.108886000 |
| 7  | -1.066487000 | 0.080455000  | 1.139853000  |
| 1  | -2.152191000 | -0.688001000 | -1.083599000 |
| 6  | -1.037839000 | 1.171386000  | 2.129505000  |
| 1  | -1.739500000 | 0.945976000  | 2.950053000  |
| 1  | -0.038795000 | 1.332188000  | 2.575797000  |
| 1  | -1.364629000 | 2.112155000  | 1.660486000  |
| 7  | -2.992552000 | -0.570522000 | -0.444227000 |
| 1  | -2.275336000 | -0.145685000 | 0.441527000  |
| 6  | -3.599393000 | -1.876099000 | -0.107673000 |
| 1  | -4.097394000 | -2.327449000 | -0.979717000 |
| 1  | -2.797521000 | -2.551135000 | 0.226196000  |
| 1  | -4.331480000 | -1.759438000 | 0.705299000  |
| 16 | 2.762620000  | -0.170682000 | -0.623466000 |
| 1  | 0.395389000  | 2.137956000  | 0.175712000  |
| 6  | 4.038548000  | -0.985381000 | 0.411768000  |
| 1  | 3.763619000  | -2.026934000 | 0.644416000  |
| 1  | 4.975588000  | -0.990727000 | -0.166728000 |
| 1  | 4.209557000  | -0.432164000 | 1.349395000  |
| 1  | -3.668056000 | 0.099367000  | -0.824390000 |
| 1  | -0.882499000 | -0.812315000 | 1.614716000  |
| 1  | 1.272717000  | -1.308706000 | 0.911829000  |
| 1  | 1.600586000  | 0.378051000  | 1.436892000  |

#### IVB

E = -877.970478445

G<sub>298</sub> = -877.753444

G<sub>403</sub> = -877.781603

|    |              |              |              |
|----|--------------|--------------|--------------|
| 7  | -0.107736000 | 1.118922000  | 1.164455000  |
| 8  | 0.533694000  | -0.967648000 | 0.227299000  |
| 6  | -0.005779000 | 0.303962000  | -0.053353000 |
| 6  | -1.426813000 | 0.079192000  | -0.615856000 |
| 6  | 1.171897000  | 1.500326000  | 1.776277000  |
| 1  | 1.851003000  | 2.076998000  | 1.117299000  |
| 1  | 0.967666000  | 2.103067000  | 2.675175000  |
| 1  | 1.702810000  | 0.592960000  | 2.102039000  |
| 7  | 0.886055000  | 0.926172000  | -1.070484000 |
| 1  | 1.539734000  | -0.894932000 | 0.395158000  |
| 6  | 0.525248000  | 2.270194000  | -1.539614000 |
| 1  | 1.280386000  | 2.605122000  | -2.268730000 |
| 1  | -0.468922000 | 2.353645000  | -2.026584000 |
| 1  | 0.547609000  | 2.984478000  | -0.700683000 |
| 7  | 3.219382000  | -1.113202000 | 0.514991000  |
| 1  | 3.708800000  | -0.217053000 | 0.603301000  |
| 6  | 3.592823000  | -1.768704000 | -0.757119000 |
| 1  | 3.039259000  | -2.716067000 | -0.850872000 |
| 1  | 3.294028000  | -1.121635000 | -1.596024000 |
| 1  | 4.673895000  | -1.983678000 | -0.852554000 |
| 16 | -2.618329000 | -0.592513000 | 0.628063000  |
| 1  | -0.661853000 | 1.955911000  | 0.958822000  |
| 6  | -3.934530000 | -1.107726000 | -0.540873000 |
| 1  | -3.561593000 | -1.863212000 | -1.251049000 |
| 1  | -4.744718000 | -1.554741000 | 0.055586000  |
| 1  | -4.341432000 | -0.247999000 | -1.097043000 |
| 1  | 3.521580000  | -1.689099000 | 1.307545000  |

|   |              |              |              |
|---|--------------|--------------|--------------|
| 1 | 0.933499000  | 0.280182000  | -1.865225000 |
| 1 | -1.342290000 | -0.649833000 | -1.437550000 |
| 1 | -1.836737000 | 1.020574000  | -1.015507000 |

#### C. Systems with X = F, Z = CH<sub>2</sub>

##### IC

E = -525.807941984

G<sub>298</sub> = -525.701605

G<sub>403</sub> = -525.722772

|   |              |              |              |
|---|--------------|--------------|--------------|
| 6 | 3.008308000  | 0.078945000  | -0.549944000 |
| 1 | 3.121392000  | -1.007739000 | -0.687400000 |
| 1 | 3.671411000  | 0.583895000  | -1.269158000 |
| 1 | 3.347889000  | 0.335826000  | 0.465153000  |
| 6 | 1.558177000  | 0.520175000  | -0.772498000 |
| 6 | 0.586118000  | -0.132264000 | 0.189158000  |
| 6 | -0.867845000 | 0.377839000  | 0.039020000  |
| 8 | -1.083822000 | 1.596678000  | 0.126861000  |
| 7 | -1.807151000 | -0.557213000 | -0.194034000 |
| 1 | -1.532661000 | -1.538163000 | -0.201523000 |
| 6 | -3.218934000 | -0.203102000 | -0.323999000 |
| 1 | -3.678909000 | -0.028634000 | 0.663191000  |
| 1 | -3.316075000 | 0.715791000  | -0.920431000 |
| 1 | -3.747379000 | -1.022572000 | -0.828288000 |
| 9 | 0.964340000  | 0.121512000  | 1.508889000  |
| 9 | 0.635858000  | -1.526298000 | 0.054355000  |
| 1 | 1.215289000  | 0.273960000  | -1.792082000 |
| 1 | 1.442949000  | 1.608211000  | -0.645737000 |

##### IIC

E = -717.622834539

G<sub>298</sub> = -717.401274

G<sub>403</sub> = -717.432624

|   |              |              |              |
|---|--------------|--------------|--------------|
| 7 | 0.652746000  | 1.648728000  | -0.057605000 |
| 8 | -1.279686000 | 2.343628000  | 0.981215000  |
| 6 | -0.620906000 | 1.506696000  | 0.328681000  |
| 6 | -1.323625000 | 0.186762000  | -0.071514000 |
| 6 | 1.389727000  | 2.850040000  | 0.326246000  |
| 1 | 1.638494000  | 2.848589000  | 1.402000000  |
| 1 | 2.321078000  | 2.892313000  | -0.254457000 |
| 1 | 0.794599000  | 3.752702000  | 0.116579000  |
| 7 | 2.427930000  | -0.297573000 | -0.955597000 |
| 1 | 0.724620000  | -1.528936000 | 1.518782000  |
| 6 | 3.799972000  | 0.139175000  | -0.631215000 |
| 1 | 4.556910000  | -0.668647000 | -0.685168000 |
| 1 | 4.116053000  | 0.944073000  | -1.314538000 |
| 1 | 3.817819000  | 0.543540000  | 0.394333000  |
| 7 | 1.383425000  | -2.202773000 | 1.115037000  |
| 1 | 2.151111000  | -1.064802000 | -0.305220000 |
| 6 | 0.615561000  | -3.273537000 | 0.447385000  |
| 1 | -0.119620000 | -3.786687000 | 1.098583000  |
| 1 | 0.069953000  | -2.848283000 | -0.407965000 |
| 1 | 1.311530000  | -4.032853000 | 0.055000000  |
| 1 | 1.217727000  | 0.858615000  | -0.513814000 |
| 1 | 1.906998000  | -2.597519000 | 1.902679000  |
| 1 | 2.395167000  | -0.678254000 | -1.906509000 |
| 9 | -0.579655000 | -0.511470000 | -1.023073000 |
| 9 | -1.311420000 | -0.637379000 | 1.074142000  |
| 6 | -2.749609000 | 0.364811000  | -0.549128000 |
| 1 | -3.277534000 | 0.925315000  | 0.237872000  |
| 1 | -2.710382000 | 1.016925000  | -1.438170000 |

|   |              |              |              |
|---|--------------|--------------|--------------|
| 6 | -3.446816000 | -0.962213000 | -0.864469000 |
| 1 | -4.474594000 | -0.775581000 | -1.212244000 |
| 1 | -2.915357000 | -1.515279000 | -1.654530000 |
| 1 | -3.501934000 | -1.603697000 | 0.028678000  |

**IIIc**

E = -717.613337869

G<sub>298</sub> = -717.391015

G<sub>403</sub> = -717.422219

|   |              |              |              |
|---|--------------|--------------|--------------|
| 7 | -0.003194000 | 1.487633000  | -1.106451000 |
| 8 | -0.347632000 | -0.767683000 | -1.385601000 |
| 6 | 0.217544000  | 0.182470000  | -0.820603000 |
| 6 | 1.431525000  | -0.110666000 | 0.091771000  |
| 6 | -1.187324000 | 1.866063000  | -1.874350000 |
| 1 | -2.116392000 | 1.625408000  | -1.328761000 |
| 1 | -1.153434000 | 2.945243000  | -2.073848000 |
| 1 | -1.199357000 | 1.325257000  | -2.831793000 |
| 7 | -1.364123000 | 0.533176000  | 1.459199000  |
| 1 | -2.582713000 | -0.891605000 | -1.115770000 |
| 6 | -1.542287000 | 1.939497000  | 1.831742000  |
| 1 | -2.401439000 | 2.149987000  | 2.506109000  |
| 1 | -0.633300000 | 2.315409000  | 2.331918000  |
| 1 | -1.688769000 | 2.550646000  | 0.924245000  |
| 7 | -3.156010000 | -1.180209000 | -0.314002000 |
| 1 | -2.202449000 | 0.157686000  | 0.986409000  |
| 6 | -2.558816000 | -2.412065000 | 0.242705000  |
| 1 | -2.513332000 | -3.262535000 | -0.467261000 |
| 1 | -1.529268000 | -2.196139000 | 0.565408000  |
| 1 | -3.130136000 | -2.738022000 | 1.127685000  |
| 1 | 0.358119000  | 2.162344000  | -0.433170000 |
| 1 | -4.090849000 | -1.388781000 | -0.679224000 |
| 1 | -1.205103000 | -0.039061000 | 2.292215000  |
| 9 | 1.100308000  | -1.144057000 | 0.956178000  |
| 9 | 1.716475000  | 0.996369000  | 0.902721000  |
| 6 | 2.671143000  | -0.494602000 | -0.702340000 |
| 1 | 2.381380000  | -1.341409000 | -1.346575000 |
| 1 | 2.911540000  | 0.353658000  | -1.364836000 |
| 6 | 3.863939000  | -0.854312000 | 0.189682000  |
| 1 | 3.632878000  | -1.717618000 | 0.832396000  |
| 1 | 4.736632000  | -1.113779000 | -0.429857000 |
| 1 | 4.144938000  | -0.008547000 | 0.836567000  |

**TSC**

E = -717.592135817

G<sub>298</sub> = -717.366160

G<sub>403</sub> = -717.393952

Imaginary frequency = 528.1i cm<sup>-1</sup>

|   |              |              |              |
|---|--------------|--------------|--------------|
| 7 | 0.072555000  | 1.622896000  | -0.686966000 |
| 8 | -0.481601000 | -0.612712000 | -1.229959000 |
| 6 | -0.018509000 | 0.203258000  | -0.286948000 |
| 6 | 1.432667000  | -0.221293000 | 0.141074000  |
| 6 | -1.178838000 | 2.167760000  | -1.223219000 |
| 1 | -2.027692000 | 2.183743000  | -0.505946000 |
| 1 | -1.008904000 | 3.201917000  | -1.561999000 |
| 1 | -1.481544000 | 1.572907000  | -2.097912000 |
| 7 | -0.954347000 | 0.065008000  | 0.998199000  |
| 1 | -2.313748000 | -0.585225000 | -1.176623000 |
| 6 | -0.884995000 | 1.080518000  | 2.068228000  |
| 1 | -1.591171000 | 0.805403000  | 2.869338000  |

|   |              |              |              |
|---|--------------|--------------|--------------|
| 1 | 0.120085000  | 1.177779000  | 2.509187000  |
| 1 | -1.195935000 | 2.060573000  | 1.676062000  |
| 7 | -3.042753000 | -0.494432000 | -0.422854000 |
| 1 | -2.227580000 | -0.127518000 | 0.390740000  |
| 6 | -3.625536000 | -1.807523000 | -0.067839000 |
| 1 | -4.234010000 | -2.214623000 | -0.889338000 |
| 1 | -2.799641000 | -2.503061000 | 0.141106000  |
| 1 | -4.248576000 | -1.709415000 | 0.833025000  |
| 1 | 0.395735000  | 2.190226000  | 0.102671000  |
| 1 | -3.750532000 | 0.203117000  | -0.673696000 |
| 1 | -0.720275000 | -0.854166000 | 1.392199000  |
| 9 | 1.341280000  | -1.429740000 | 0.857329000  |
| 9 | 1.962385000  | 0.697302000  | 1.078482000  |
| 6 | 2.418163000  | -0.400558000 | -0.996137000 |
| 1 | 1.972178000  | -1.142951000 | -1.675211000 |
| 1 | 2.454791000  | 0.554938000  | -1.542331000 |
| 6 | 3.812612000  | -0.830441000 | -0.527962000 |
| 1 | 3.770482000  | -1.784629000 | 0.020445000  |
| 1 | 4.482339000  | -0.964945000 | -1.392094000 |
| 1 | 4.262255000  | -0.075073000 | 0.135922000  |

**IVc**

E = -717.603515841

G<sub>298</sub> = -717.376579

G<sub>403</sub> = -717.405609

|   |              |              |              |
|---|--------------|--------------|--------------|
| 7 | 1.791046000  | -1.107104000 | -0.427262000 |
| 8 | 0.510903000  | 0.703464000  | -1.127135000 |
| 6 | 0.782259000  | -0.105575000 | -0.016234000 |
| 6 | -0.503866000 | -0.917338000 | 0.371282000  |
| 6 | 2.726294000  | -0.715338000 | -1.494235000 |
| 1 | 3.245569000  | 0.250567000  | -1.344582000 |
| 1 | 3.490552000  | -1.505251000 | -1.574633000 |
| 1 | 2.199181000  | -0.662826000 | -2.458433000 |
| 7 | 1.121488000  | 0.722990000  | 1.158766000  |
| 1 | -0.080588000 | 1.499930000  | -0.812627000 |
| 6 | 2.412717000  | 1.418888000  | 1.052238000  |
| 1 | 2.542525000  | 2.067396000  | 1.933088000  |
| 1 | 3.294539000  | 0.749200000  | 0.991519000  |
| 1 | 2.403993000  | 2.062324000  | 0.159389000  |
| 7 | -1.000325000 | 2.673874000  | -0.193783000 |
| 1 | -0.901138000 | 2.357999000  | 0.777853000  |
| 6 | -2.418716000 | 2.640293000  | -0.604828000 |
| 1 | -2.505690000 | 2.988611000  | -1.645924000 |
| 1 | -2.778091000 | 1.601770000  | -0.562424000 |
| 1 | -3.079093000 | 3.264086000  | 0.026377000  |
| 1 | 2.308542000  | -1.388152000 | 0.409046000  |
| 1 | -0.638052000 | 3.631665000  | -0.234468000 |
| 1 | 1.126114000  | 0.116856000  | 1.985724000  |
| 9 | -1.470836000 | -0.033266000 | 0.875117000  |
| 9 | -0.182856000 | -1.744248000 | 1.467824000  |
| 6 | -1.129411000 | -1.746377000 | -0.732454000 |
| 1 | -1.313566000 | -1.063531000 | -1.576748000 |
| 1 | -0.371957000 | -2.472112000 | -1.061030000 |
| 6 | -2.417679000 | -2.450224000 | -0.291939000 |
| 1 | -3.194302000 | -1.724995000 | -0.003689000 |
| 1 | -2.816244000 | -3.065909000 | -1.113459000 |
| 1 | -2.231344000 | -3.112002000 | 0.568594000  |

## ***Kinetic data and graphs***

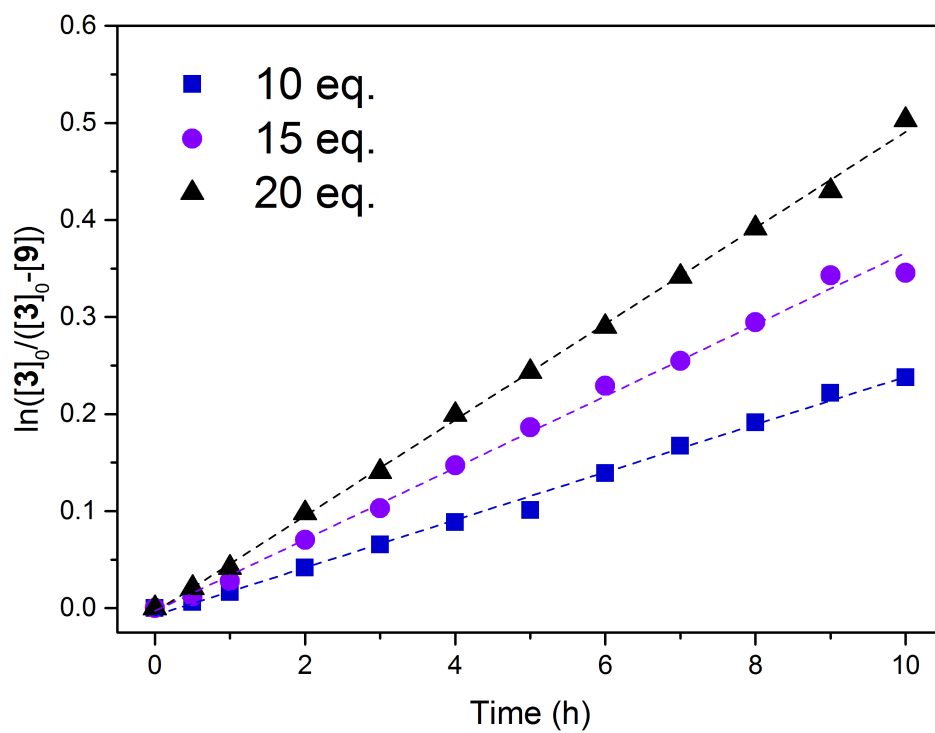

Figure S24. Transamidation of **3** with **8** monitoring in MST at 130 °C in presence of 10, 15 and 20 eq. of **8**

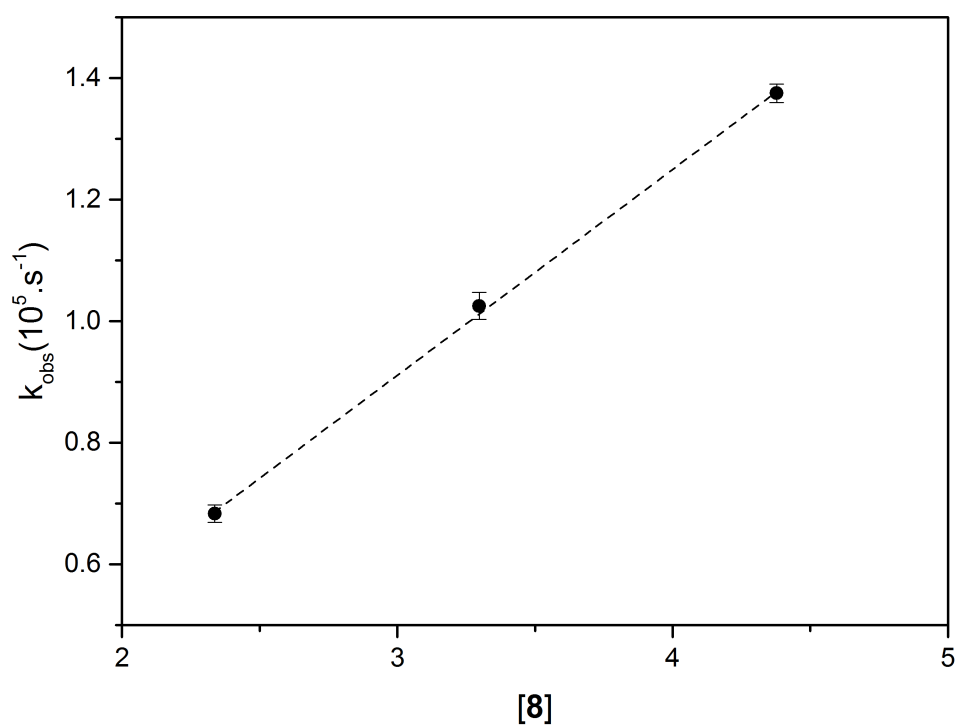

Figure S25. Plot of  $k_{obs}$  as a function of  $[8]_0$  at 25 °C

Table S2. Pseudo-first order rate constants from the least-squares linear fits of the data in Figure S24

| $[3]_0$ | $[8]_0$ | $k_{\text{obs}} (\text{s}^{-1})$ |
|---------|---------|----------------------------------|
| 0.25    | 2.4     | $(0.68 \pm 0.01) \cdot 10^{-5}$  |
| 0.22    | 3.3     | $(1.03 \pm 0.02) \cdot 10^{-5}$  |
| 0.21    | 4.4     | $(1.38 \pm 0.02) \cdot 10^{-5}$  |

Table S3. Summary of the variable-temperature kinetic data for the transamidation of **3** with **8** in MST.

| T (°C) | 1000/T (K <sup>-1</sup> ) | k (M <sup>-1</sup> s <sup>-1</sup> ) | ln(kh/Tk <sub>B</sub> ) |
|--------|---------------------------|--------------------------------------|-------------------------|
| 110    | 2.61                      | $(1.26 \pm 0.05) \cdot 10^{-6}$      | $-43.29 \pm 0.04$       |
| 120    | 2.54                      | $(1.71 \pm 0.07) \cdot 10^{-6}$      | $-43.01 \pm 0.04$       |
| 130    | 2.48                      | $(2.08 \pm 0.06) \cdot 10^{-6}$      | $-42.84 \pm 0.03$       |
| 140    | 2.42                      | $(2.93 \pm 0.09) \cdot 10^{-6}$      | $-42.52 \pm 0.03$       |

## ***Material characterizations***

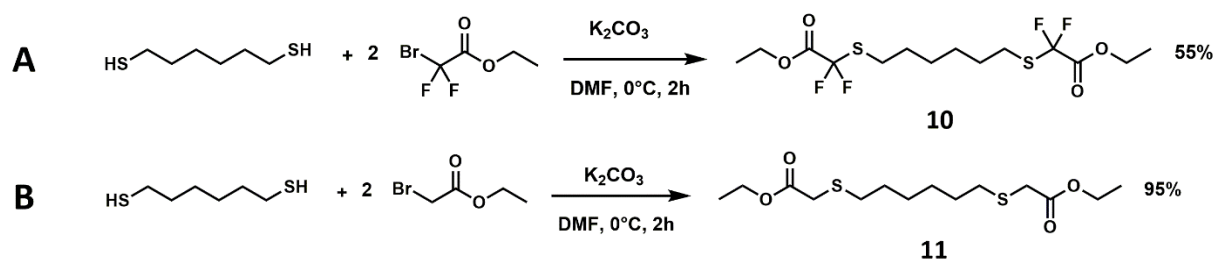

Scheme S1. Syntheses of A) fluorinated and B) non-fluorinated diesters

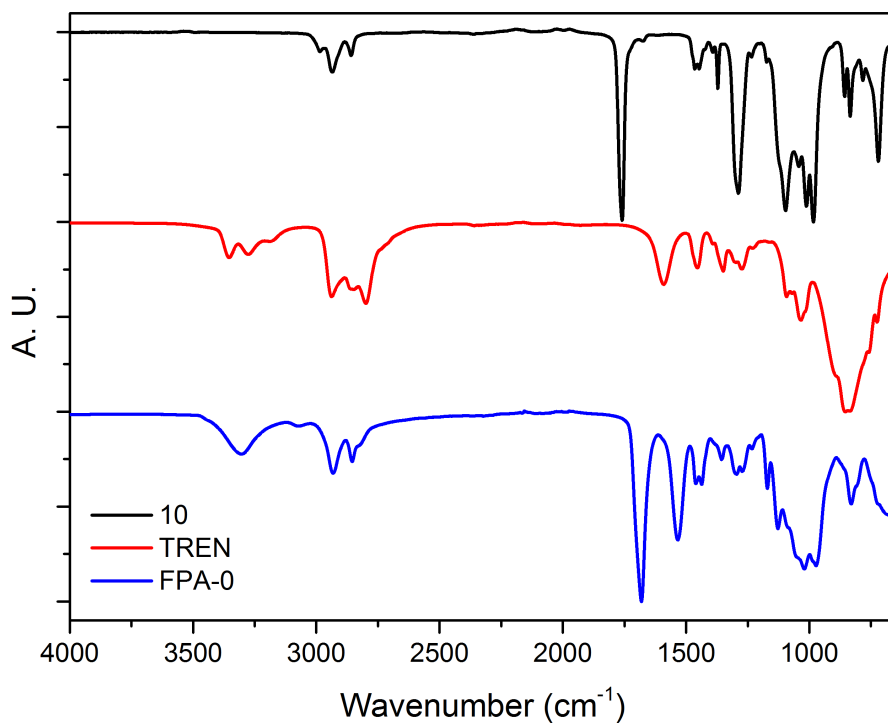

Figure S26. FTIR spectra of **10** (top black curve), **TREN** (middle red curve) and **FPA-0** (bottom blue curve)



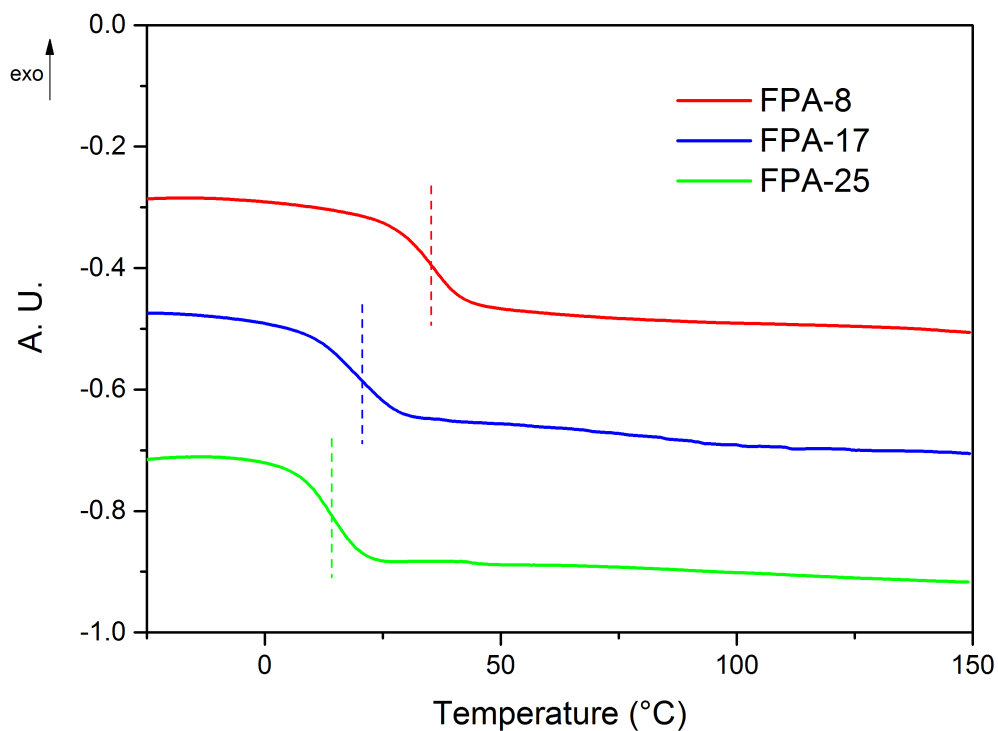

Figure S27. DSC curves (2<sup>nd</sup> heating ramp) of **FPA-8** (top red curve), **FPA-17** (blue middle curve) and **FPA-25** (green bottom curve)

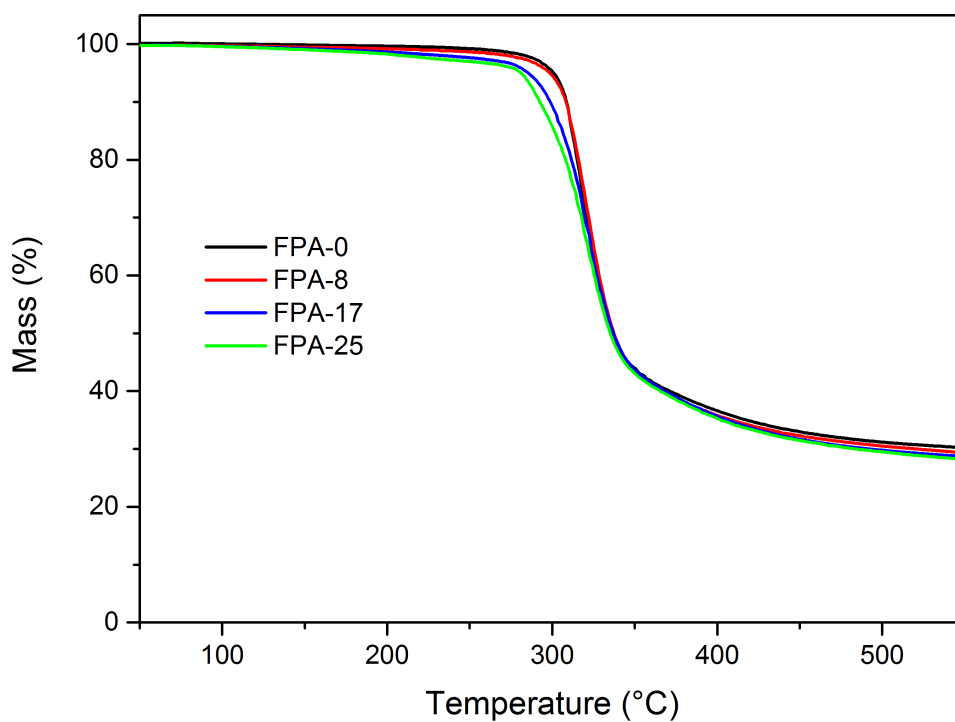

Figure S28. TGA of **FPA-0** (red curve), **FPA-8** (red curve), **FPA-17** (blue curve) and **FPA-25** (green curve)

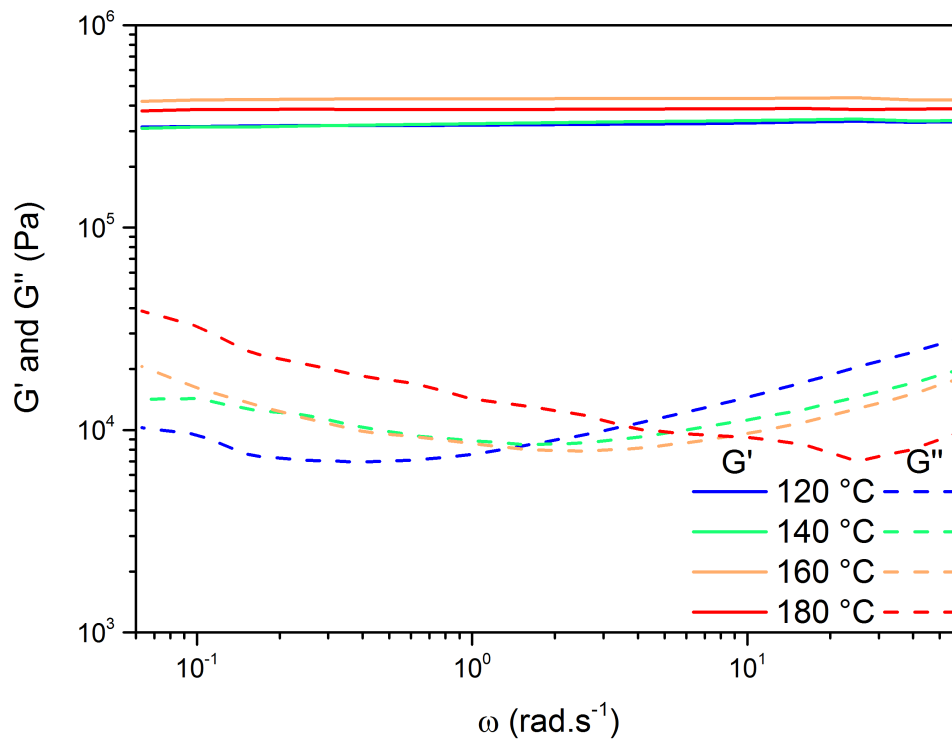

Figure S29. Frequency sweep measurements from 50 to 0.5  $\text{rad}\cdot\text{s}^{-1}$  of FPA-25 for temperature going from 120 °C to 180 °C

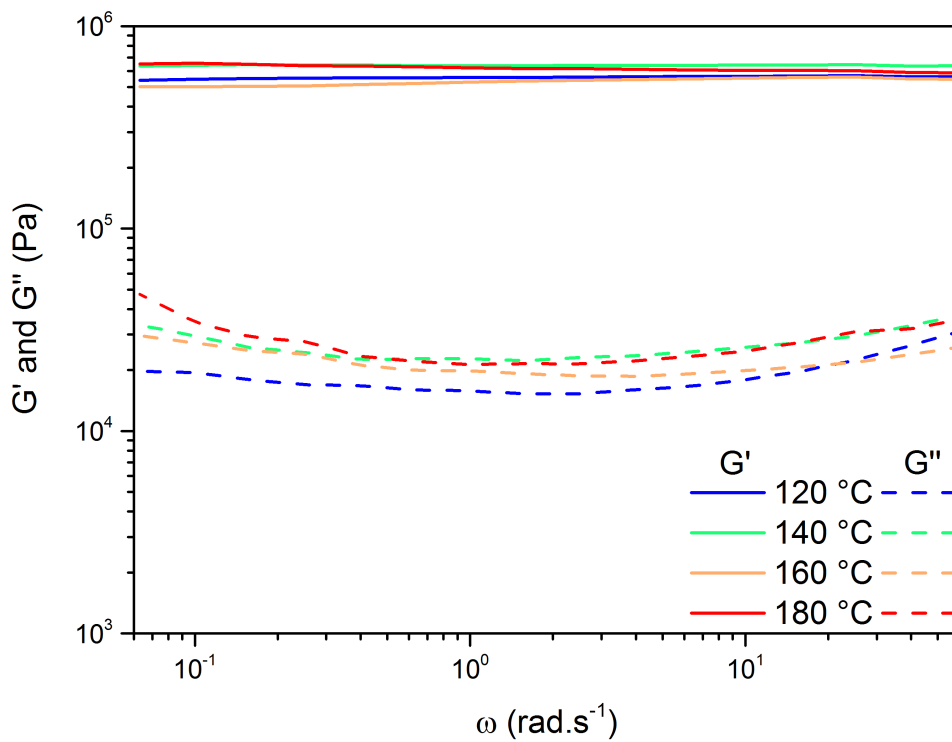

Figure S30. Frequency sweep measurements from 50 to 0.5  $\text{rad}\cdot\text{s}^{-1}$  of FPA-17 for temperature going from 120 °C to 180 °C

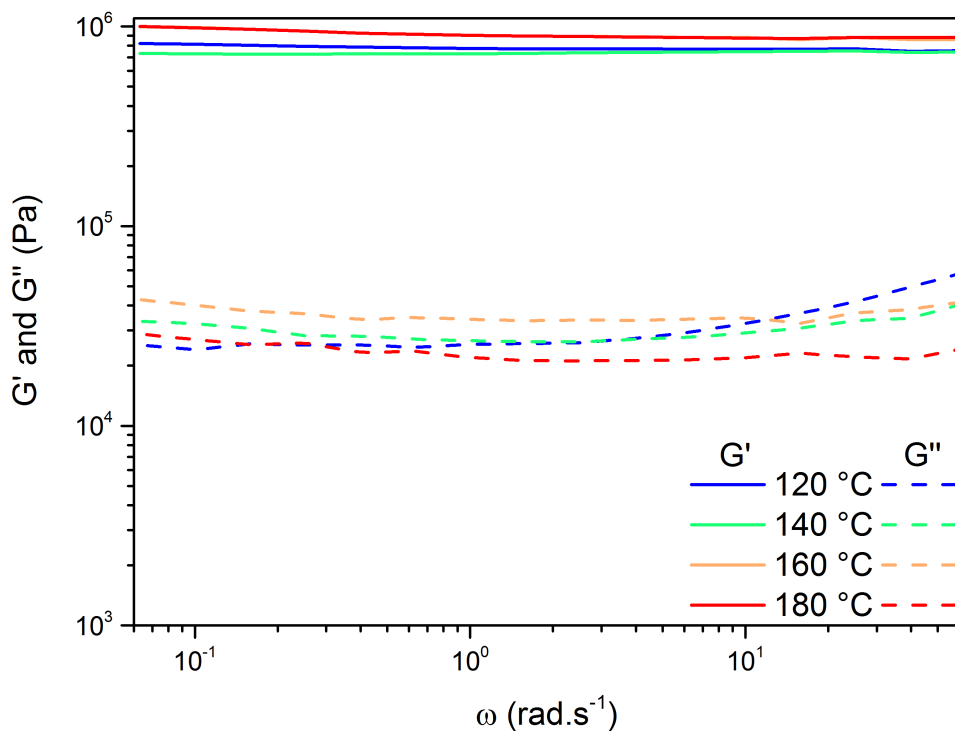

Figure S31. Frequency sweep measurements from 50 to 0.5  $\text{rad}\cdot\text{s}^{-1}$  of FPA-8 for temperature going from 120 °C to 180 °C

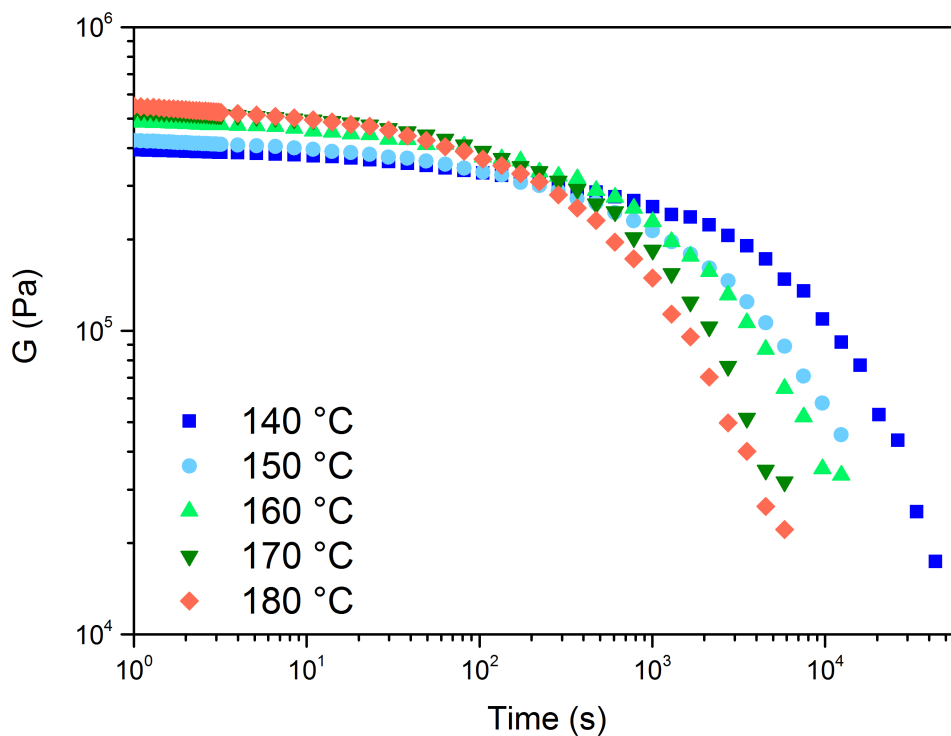

Figure S32. Non-Normalized stress relaxation for FPA-25.

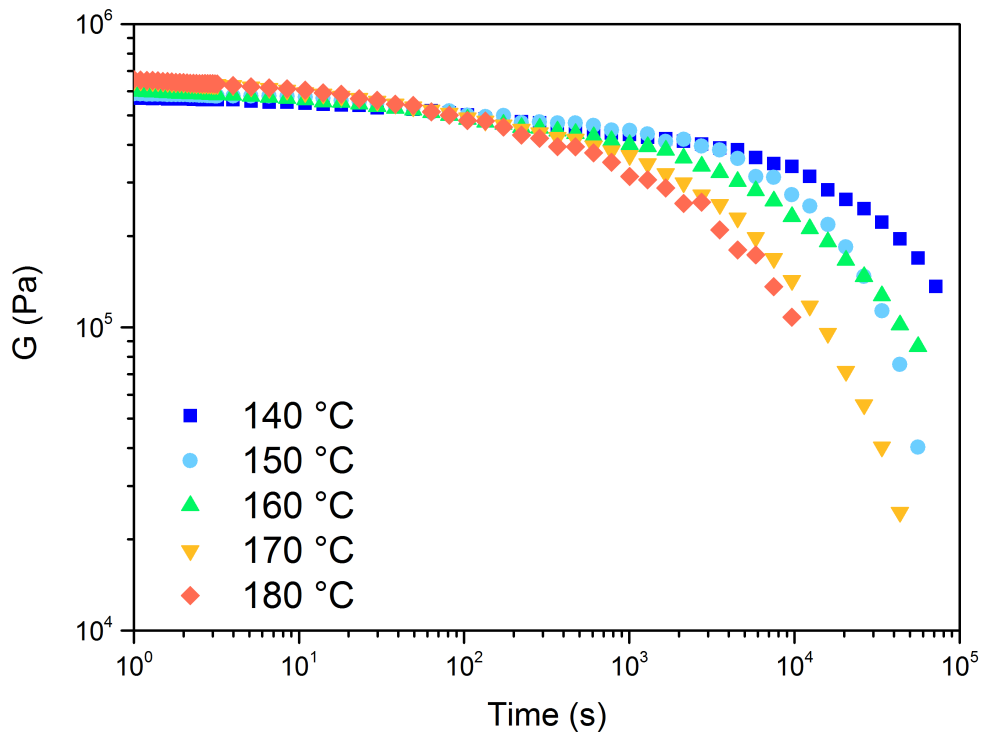

Figure 33. Non-Normalized stress relaxation for **FPA-17**.

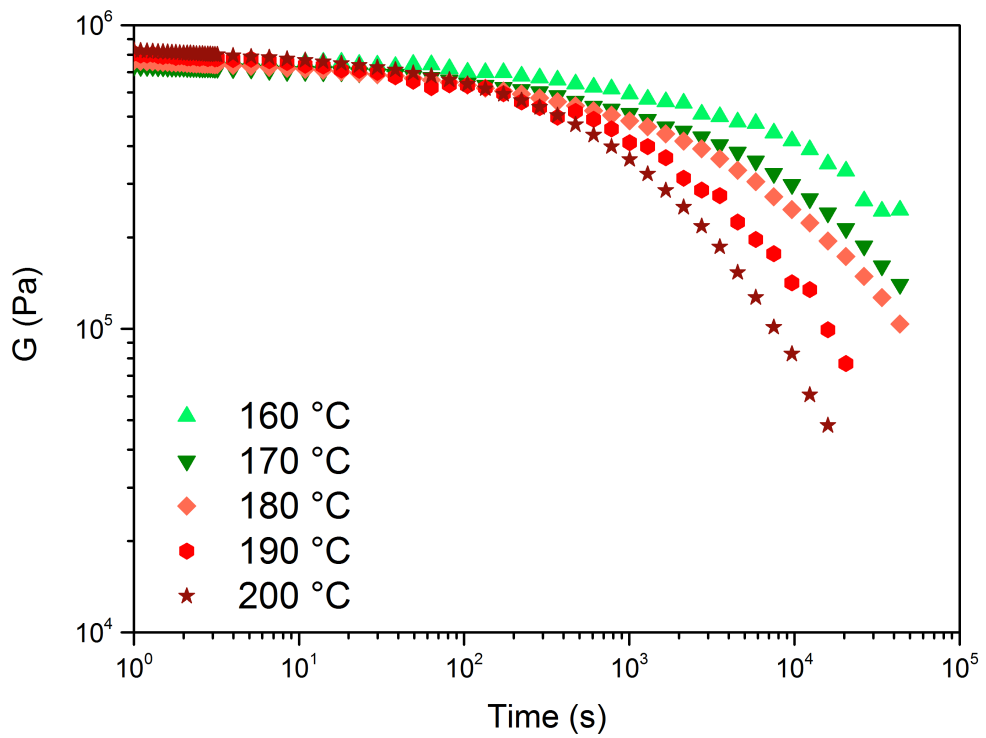

Figure S34. Non-Normalized stress relaxation for **FPA-8**.

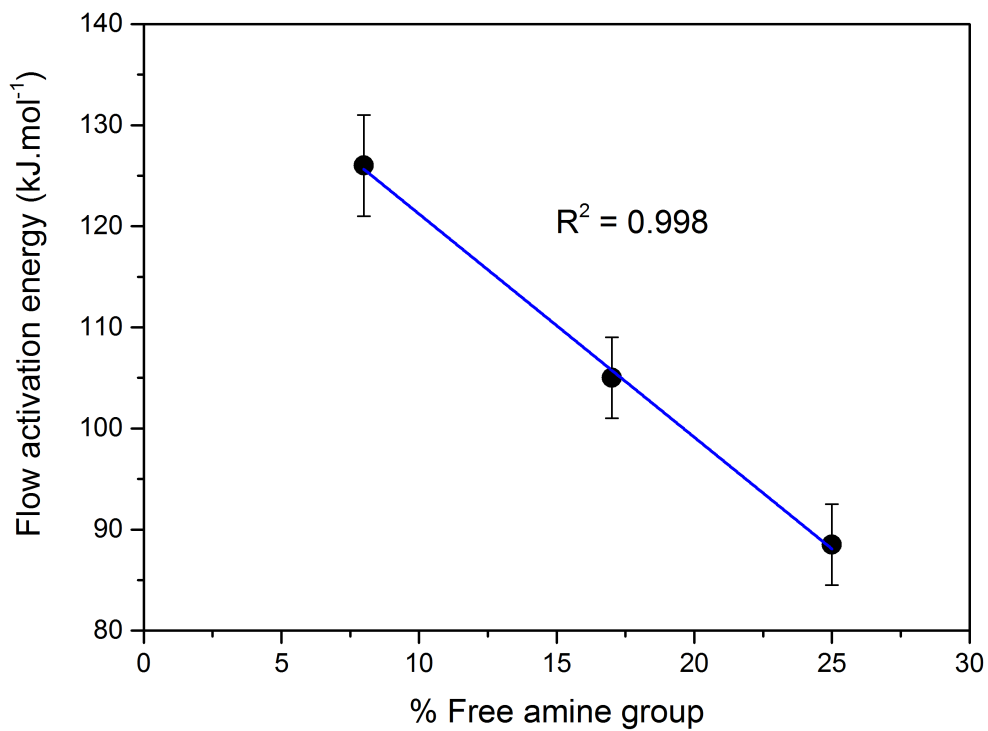

Figure 35. Plot of flow activation energy vs. percentage of free amine in FPA.

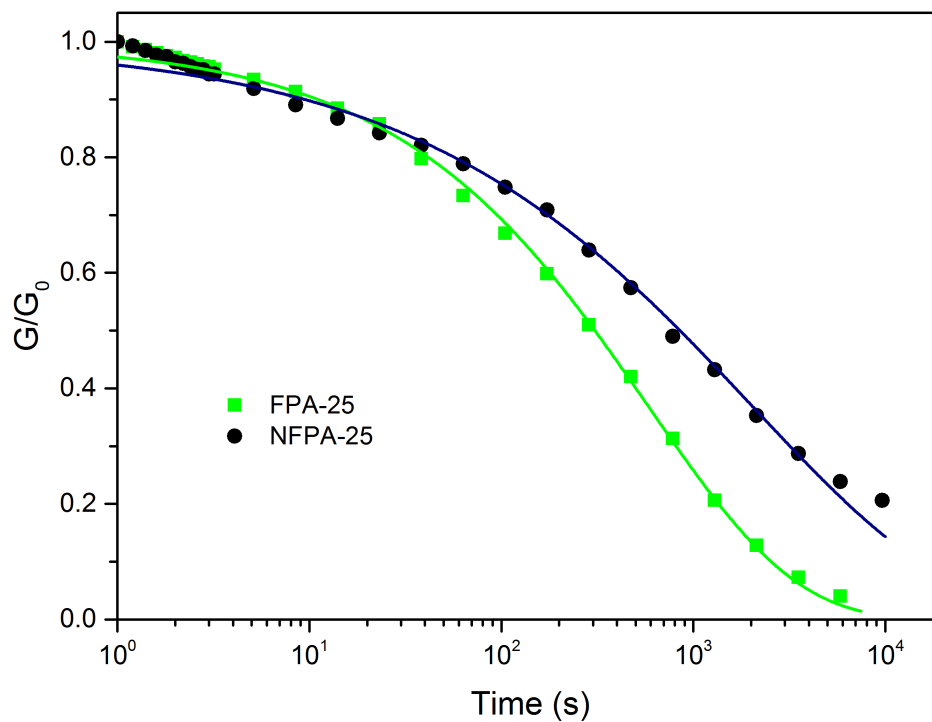

Figure S36. Normalized stress-relaxation of FPA-25 (green curve) and of NFPA-25 (black curve) at 180 °C.

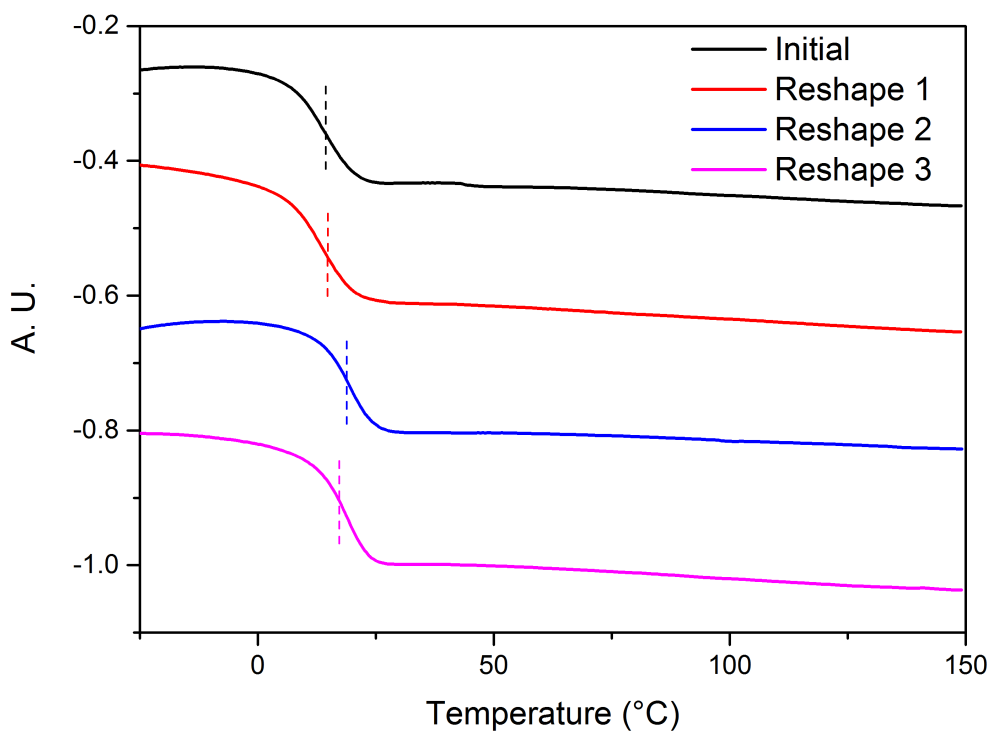

Figure S37. DSC curves of initial **FPA-25** (black curve) and after one (red curve), two (blue curve) and three (magenta curve) reprocessing cycles

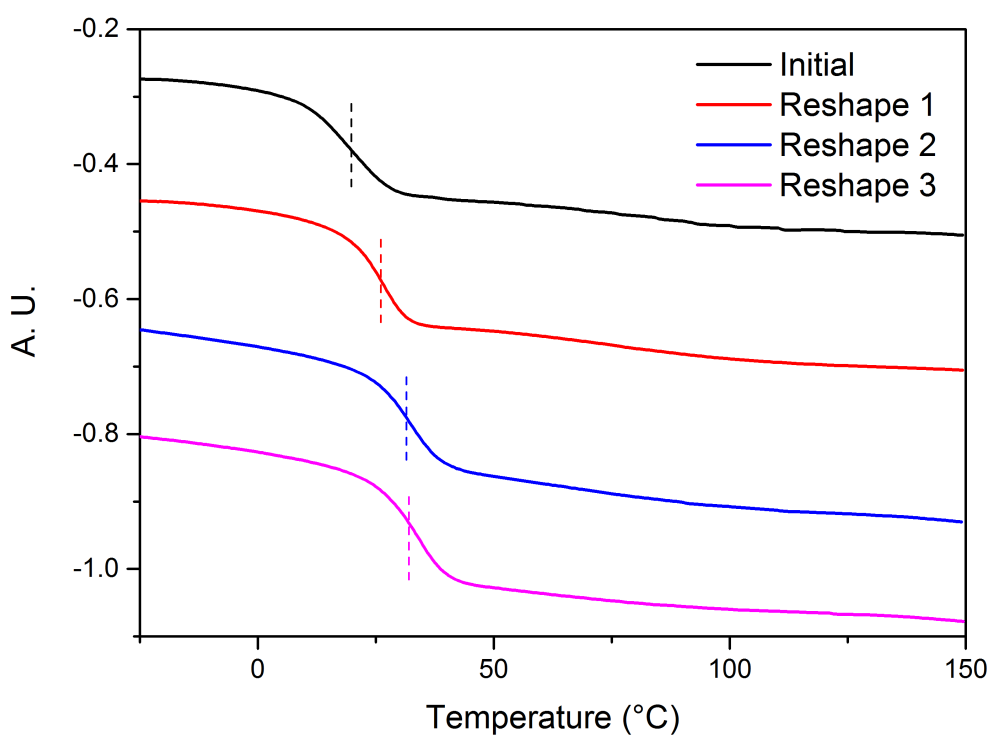

Figure S38. DSC curves of initial **FPA-17** (black curve) and after one (red curve), two (blue curve) and three (magenta curve) reprocessing cycles

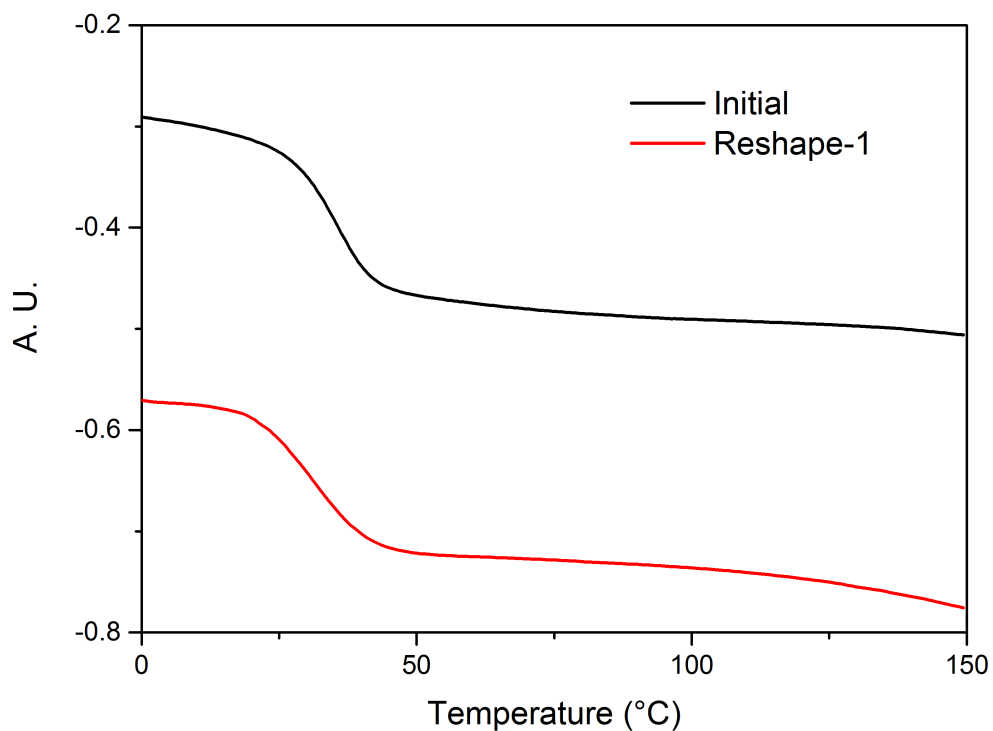

Figure S39. DSC curves of initial **FPA-8** (black curve) and after one reprocessing cycle (red curve)

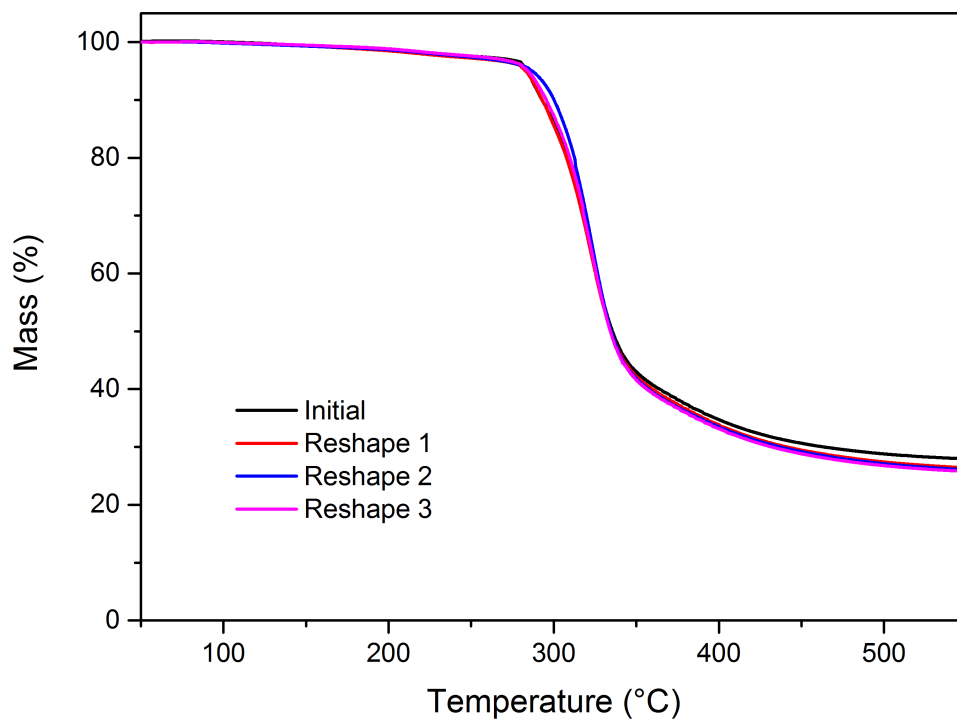

Figure S40. TGA of initial **FPA-25** (black curve) and after one (red curve), two (blue curve) and three (magenta curve) reprocessing cycles

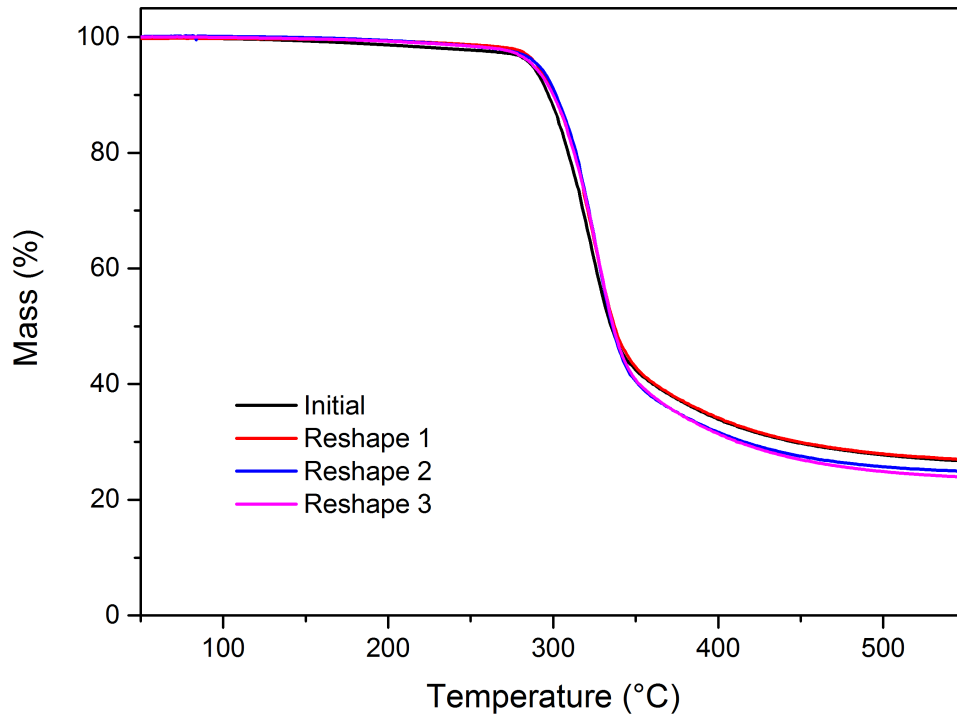

Figure S41. TGA of initial **FPA-17** (black curve) and after one (red curve), two (blue curve) and three (magenta curve) reprocessing cycles

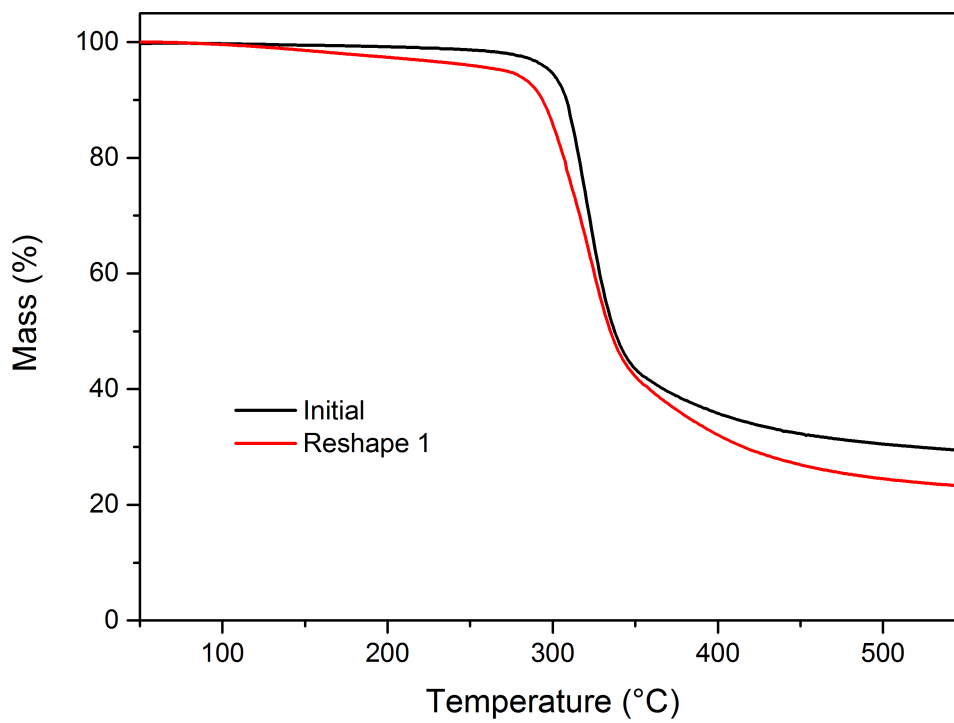

Figure 42. TGA curves of initial **FPA-8** (black curve) and after one reprocessing cycle (red curve)



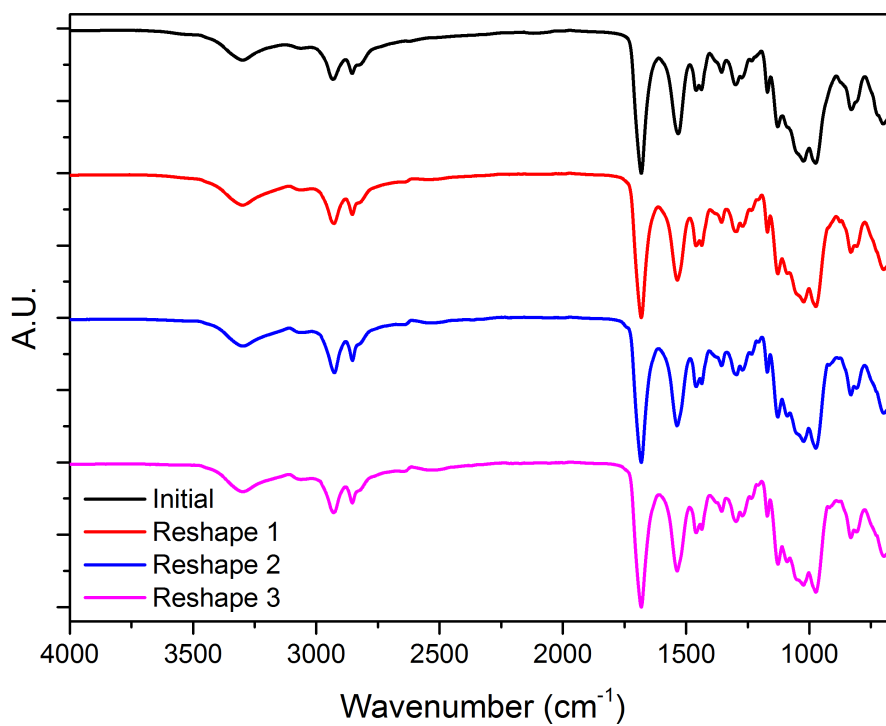

Figure S43. FTIR of initial **FPA-25** (black curve) and after one (red curve), two (blue curve) and three (magenta curve) reprocessing cycles

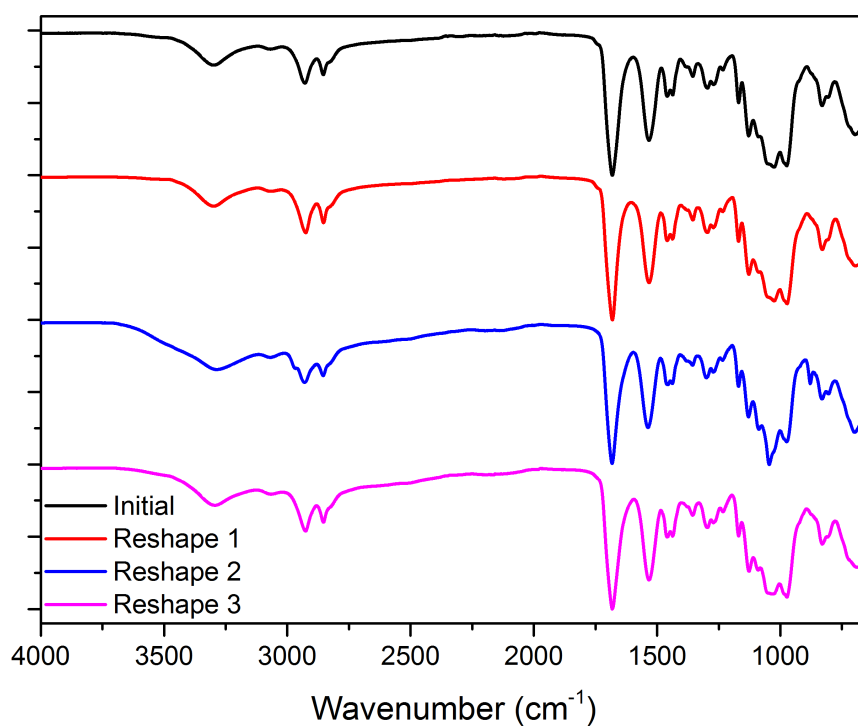

Figure S44. FTIR of initial **FPA-17** (black curve) and after one (red curve), two (blue curve) and three (magenta curve) reprocessing cycles

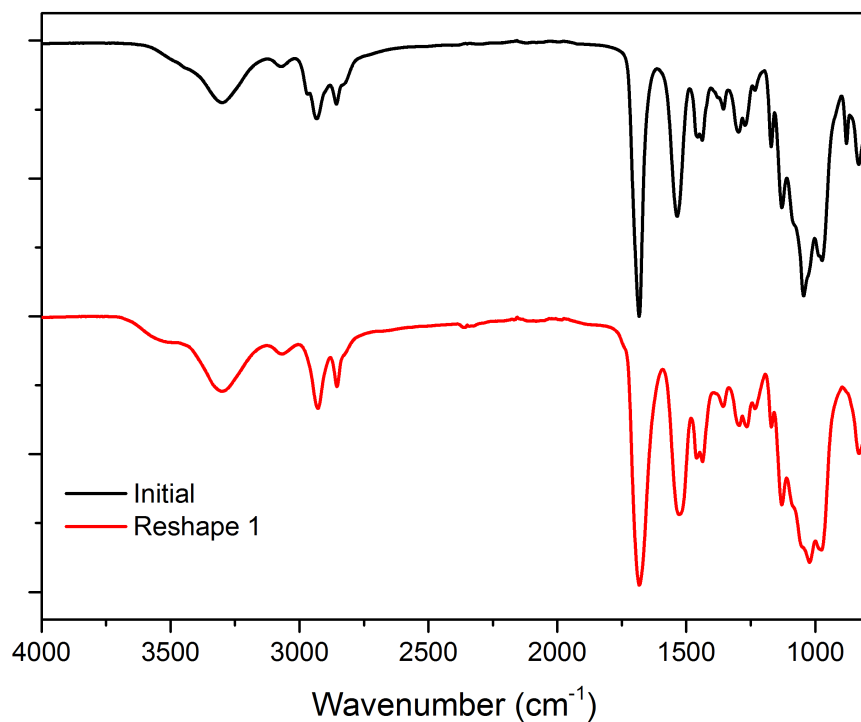

Figure 45. FTIR of initial **FPA-8** (black curve) and after one reprocessing cycle (red curve)

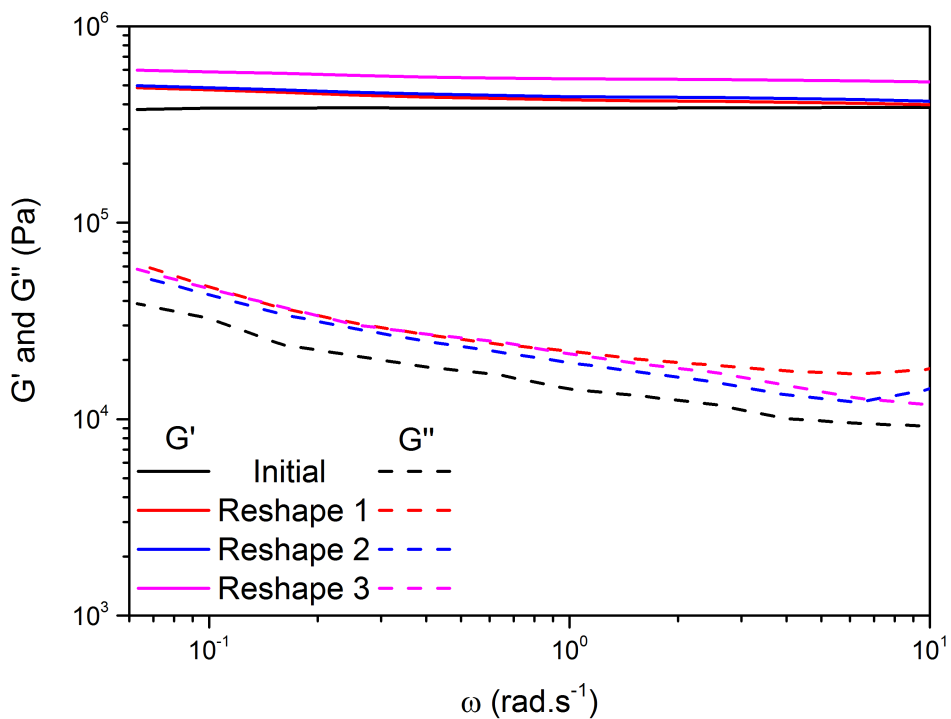

Figure S46. Frequency sweep measurements from 10 to 0.5  $\text{rad.s}^{-1}$  at 180 °C of initial **FPA-25** (black curve) and after one (red curve), two (blue curve) and three (magenta curve) reprocessing cycles

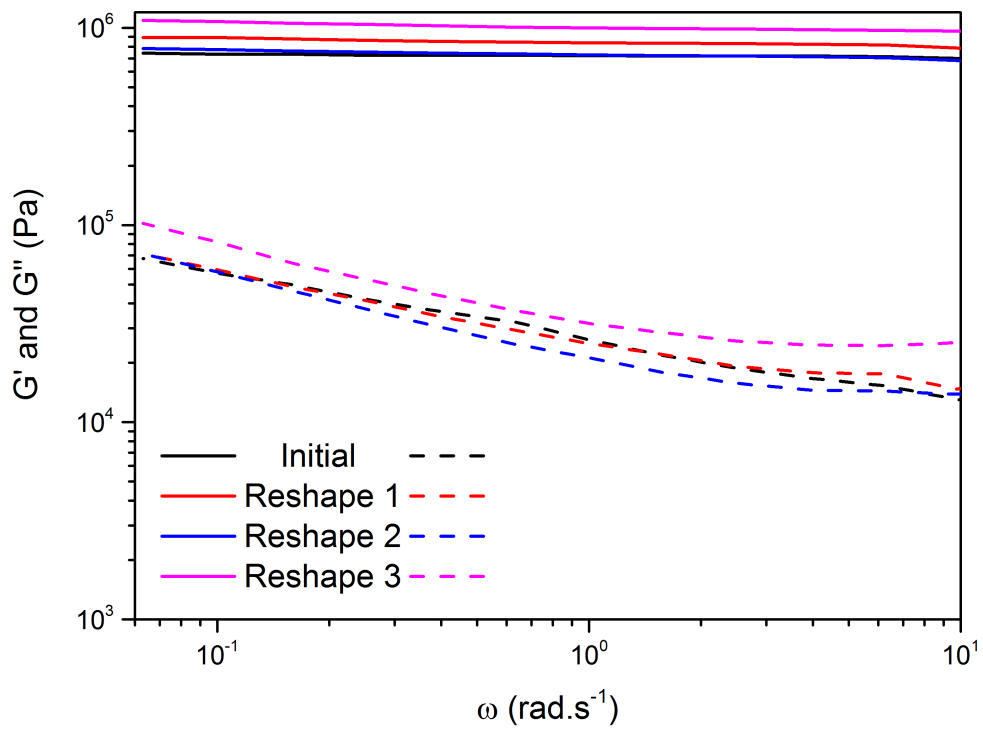

Figure S47. Frequency sweep measurements from 10 to 0.5  $\text{rad}\cdot\text{s}^{-1}$  at 180 °C of initial **FPA-17** (black curve) and after one (red curve), two (blue curve) and three (magenta curve) reprocessing cycles
